# Supplementary material
Source: MDPI journal article supplement (https://www.mdpi.com/2311-7524/9/12/1262)
Supplement: s1 [file s1 › Supplemental figures.pdf]

***Supplemental Information***

**Identification and analysis of reference and tissue-specific genes in bitter gourd based on transcriptome data**

Yangyi Zheng<sup>1</sup>, Yao Ma<sup>1,2</sup>, Jianning Luo<sup>1,3</sup>, Junxing Li<sup>1</sup>, Xiaoming Zheng<sup>1</sup>, Hao Gong<sup>1</sup>, Liting Deng<sup>1</sup>, Gangjun Zhao<sup>1</sup>, Caixia Luo<sup>1</sup>, Xiaoxi Liu<sup>1\*</sup>, and Haibin Wu<sup>1,3\*</sup>

<sup>1</sup>Guangdong Key Laboratory for New Technology Research of Vegetables, Vegetable Research Institute, Guangdong Academy of Agricultural Sciences, Guangzhou, China

<sup>2</sup>School of Life Sciences, South China Normal University, Guangzhou, China

<sup>3</sup>Guangdong Laboratory for Linnan Modern Agricultural, Guangzhou, China

\*Correspondence: liuxiaoxi@gdaas.cn, whbhope@yeah.net

**This file includes Supplemental Figure 1**

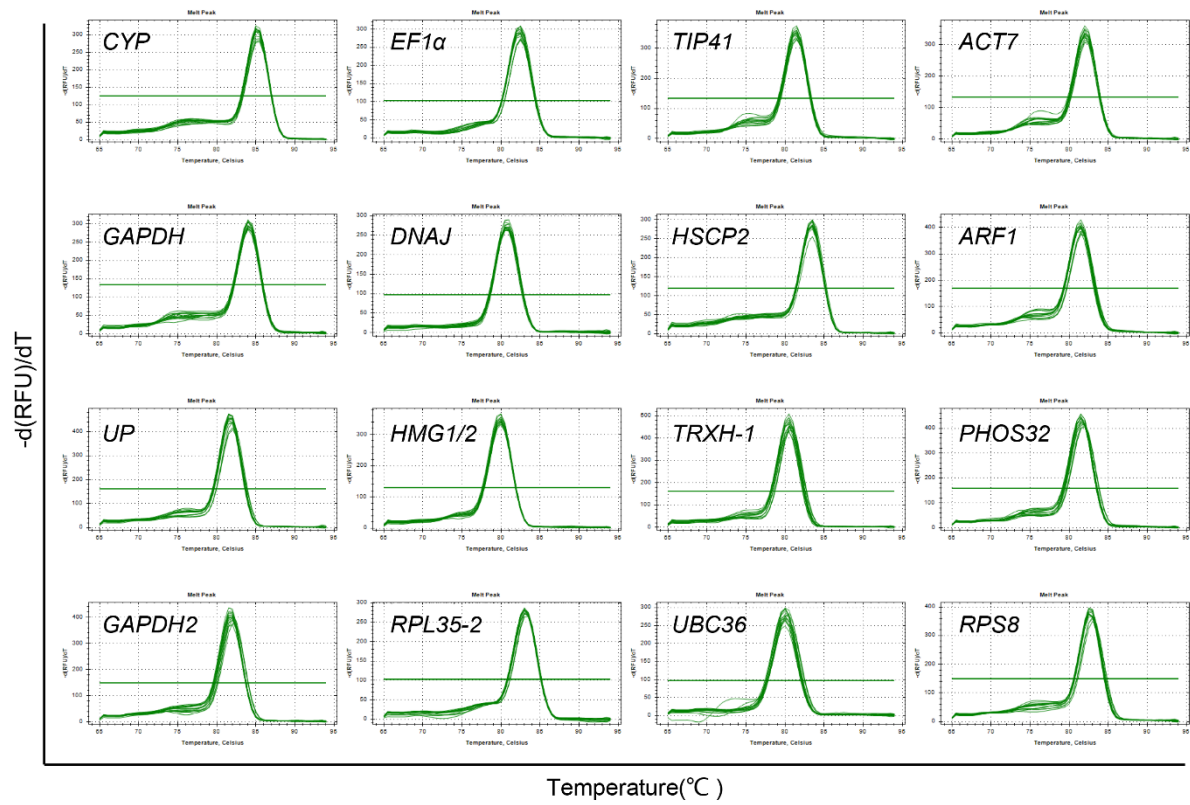

**Figure S1. Primer pair specificity for qRT-PCR amplification.**

Melting curves of 5 traditional reference genes (TRGs) and 11 new reference genes (NRGs) exhibiting only single peaks.
