# Supplementary material
Source: MDPI journal article supplement (https://www.mdpi.com/2311-7524/9/12/1262)
Supplement: s1 [file s1 › Supplemental tables.xlsx]

## Sheet: candidate reference genes
	Table S1. List of candidate reference genes after screening
	Gene symbol	Root average FPKM	Stem average FPKM	Male flower average FPKM	Female flower average FPKM	Leaf average FPKM	Pulp at green mature stage average FPKM	Pulp at breaker stage average FPKM	Pulp at turning stage average FPKM	Pulp at yellow stage average FPKM	CV	τ-value	Average log2(TPM)
	111018672	907.044	502.103	941.753	643.482	312.277	547.471	598.662	1160.4	891.429	0.369813	0.424314	9.88857
	111013580	134.025	537.026	594.06	791.729	395.087	507.816	692.585	397.651	812.525	0.39857	0.376946	9.41468
	111006269	706.664	167.331	604.954	343.462	127.118	721.378	517.586	600.815	496.434	0.459084	0.382369	9.17829
	111013893	469.043	353.288	709.763	640.202	219.538	294.813	290.45	352.876	383.091	0.399496	0.471073	9.0825
	111012664	251.981	195.365	553.933	514.062	198.688	477.451	403.444	505.904	636.415	0.392065	0.390958	9.0661
	111009092	477.271	203.421	549.317	295.943	118.918	435.008	344.542	650.244	679.143	0.463482	0.434091	9.01325
	111009491	264.115	300.143	567.372	366.725	248.943	262.652	271.317	328.592	467.574	0.318897	0.446998	8.85032
	111008959	433.899	249.464	245.162	270.232	139.965	578.382	454.026	357.665	178.37	0.444005	0.496703	8.69268
	111016660	162.768	331.664	230.891	232.552	214.4	265.937	276.094	259.166	476.979	0.329246	0.48282	8.51759
	111012841	138.036	145.69	389.497	357.058	109.07	279.427	324.397	413.011	466.941	0.451876	0.42279	8.50859
	111006736	281.876	447.344	62.2063	186.413	278.006	336.131	282.673	334.953	384.474	0.389226	0.400145	8.49743
	111011461	293.972	408.597	147.808	276.539	247.201	425.676	238.189	239.206	168.076	0.348771	0.406947	8.49657
	111019384	381.953	393.576	38.4117	215.444	235.598	490.626	298.506	355.438	257.225	0.440545	0.445568	8.45944
	111020664	378.29	359.11	212.858	200.727	287.857	324.91	291.499	309.941	77.6172	0.344917	0.317811	8.45456
	111013549	139.526	291.265	370.513	424.702	162.662	192.456	141.624	277.385	378.163	0.416657	0.425011	8.41499
	111019077	209.584	144.748	200.27	217.348	94.6608	362.28	360.648	423.438	391.593	0.444254	0.415164	8.39997
	111004918	306.935	310.067	83.2861	178.345	233.679	433.43	199.693	221.389	335.793	0.400733	0.460931	8.36114
	111011551	289.89	385.366	205.003	231.933	261.575	352.821	183.272	197.767	107.009	0.353291	0.406646	8.34327
	111010277	220.003	249.777	151.799	186.756	170.676	331.238	295.025	269.628	218.148	0.254955	0.335141	8.30827
	111011775	414.87	320.312	106.376	188.921	195.009	245.423	228.892	233.148	206.786	0.366608	0.4803	8.2954
	111019064	321.87	351.758	62.2209	210.56	223.963	291.22	191.411	213.899	237.198	0.361836	0.377292	8.23028
	111017297	350.006	315.659	77.1427	150.225	192.501	288.399	218.766	230.7	213.382	0.371559	0.397591	8.19744
	111011823	249.01	301.381	55.2119	173.445	240.874	300.08	214.202	238.81	263.402	0.333496	0.280382	8.18308
	111008562	319.944	331.558	101.655	211.89	238.391	234.815	154.011	237.91	148.492	0.348086	0.379028	8.18216
	111015881	99.4171	227.991	300.802	317.999	135.163	227.987	163.698	235.753	257.243	0.334757	0.352178	8.17446
	111017508	317.21	193.578	194.119	179.67	89.138	266.262	182.931	247.824	268.14	0.31133	0.360967	8.1631
	111006723	175.332	262.015	89.0488	183.959	197.83	279.348	194.692	241.356	307.372	0.306898	0.339733	8.15857
	111006763	264.655	348.783	141.429	190.409	216.365	174.875	138.324	157.246	189.76	0.333324	0.47207	8.08859
	111022408	364.307	245.85	76.811	174.782	187.262	385.067	206.915	248.113	80.8883	0.49168	0.485502	8.07653
	111005284	258.544	226.359	47.3566	149.487	148.612	292.505	192.521	277.678	291.555	0.395417	0.319621	8.03662
	111007576	166.107	102.198	304.074	177.373	100.525	240.558	204.792	272.522	223.975	0.352647	0.388286	8.03435
	111023298	136.398	275.692	160.003	123.803	151.355	193.464	209.64	262.358	226.258	0.282563	0.336542	8.03124
	111023187	98.049	142.108	159.176	192.277	118.415	342.712	217.168	235.228	243.141	0.388636	0.487339	7.99384
	111009591	182.504	262.442	172.874	214.965	168.723	268.781	135.707	138.044	135.391	0.277202	0.343959	7.98603
	111017979	189.832	244.071	118.187	137.946	176.424	190.715	206.533	117.035	325.171	0.34817	0.469225	7.98209
	111018649	214.673	207.961	87.2428	222.4	133.085	283.145	168.857	182.418	186.438	0.297831	0.380585	7.97189
	111016259	89.6043	164.658	303.176	272.775	116.17	124.33	119.206	249.764	330.279	0.468828	0.455127	7.95931
	111019446	97.2667	219.443	259.477	335.89	164.053	156.126	94.4954	106.893	283.079	0.461837	0.486129	7.92074
	111021992	316.595	247.608	46.1346	153.679	138.678	210.391	166.169	191.343	202.772	0.403355	0.46431	7.8783
	111004976	131.595	245.662	110.46	151.15	134.777	225.159	121.561	179.74	277.828	0.344565	0.415059	7.87025
	111008353	247.141	92.8778	285.47	226.907	91.9074	243.872	193.276	132.855	110.063	0.413464	0.413731	7.86156
	111009851	166.527	257.456	83.0464	179.986	172.761	165.906	146.474	167.621	185.231	0.265031	0.384578	7.84233
	111013871	126.616	182.151	72.0939	125.826	177.498	267.561	181.218	197.796	227.966	0.337343	0.396788	7.83776
	111012865	56.8341	181.389	174.28	165.952	139.645	221.925	142.124	178.33	293.465	0.369803	0.463106	7.81105
	111008338	212.313	258.273	54.7286	133.062	175.963	298.945	168.134	106.003	163.546	0.428959	0.46812	7.79253
	111020347	239.359	242.697	65.6798	160.724	168.424	198.591	124.632	135.467	144.951	0.343139	0.362461	7.76069
	111022014	179.59	54.8565	297.455	210.878	50.1284	286.6	188.545	191.443	148.506	0.483989	0.449267	7.75214
	111008485	119.241	179.205	95.6989	119.717	128.795	209.3	120.68	257.977	209.98	0.348089	0.426976	7.73641
	111020742	195.916	276.83	115.034	159.929	139.737	176.823	93.7192	113.732	127.923	0.359722	0.493004	7.69642
	111016129	210.445	239.131	35.4504	106.163	120.683	270.748	158.512	150.222	199.799	0.439498	0.436559	7.67516
	111011162	71.7107	164.743	180.483	120.475	229.414	238.466	139.806	136.039	109.479	0.354762	0.396061	7.67418
	111012013	292.127	255.809	49.8787	135.573	124.604	125.089	102.634	169.3	209.202	0.473954	0.498468	7.67069
	111018628	176.472	194.297	69.168	172.447	141.832	148.696	118.902	147.145	178.983	0.25407	0.257809	7.66134
	111010508	107.685	149.339	249.906	99.7493	29.7316	260.647	157.376	230.821	227.035	0.473297	0.399742	7.65288
	111008263	77.9143	103.56	146.368	124.701	112.269	233.128	129.959	178.262	246.262	0.385215	0.438524	7.62839
	111018041	153.671	66.3944	252.6	151.362	44.1104	178.545	202.852	193.705	154.207	0.420045	0.433468	7.60168
	111011884	87.6482	119.89	93.7247	115.856	108.033	187.198	141.546	204.519	252.168	0.388324	0.475341	7.58566
	111009707	189.647	159.836	53.0803	91.0481	111.299	145.142	185.496	158.597	225.771	0.365872	0.394216	7.57456
	111023378	211.713	250.578	40.2207	124.887	162.968	188.979	129.949	144.857	100.893	0.414325	0.44904	7.57321
	111008867	152.64	214.883	50.5832	128.104	138.001	151.573	119.406	120.662	211.213	0.348144	0.376298	7.55052
	111020058	198.867	82.8031	161.143	247.182	37.0773	124.071	135.096	152.134	212.623	0.434574	0.441801	7.54639
	111011305	75.8087	82.6147	192.78	169.745	50.6787	207.722	169.229	164.742	209.594	0.413251	0.336025	7.5392
	111019966	83.5636	133.48	64.1743	101.735	100.096	247.371	179.906	179.534	214.226	0.436559	0.466028	7.53754
	111012669	77.5973	103.159	166.04	140.196	82.5116	159.245	178.776	173.601	147.812	0.285885	0.265729	7.52069
	111012600	182.248	118.449	169.49	137.331	84.6717	115.7	124.989	154.767	114.002	0.229612	0.300814	7.51522
	111009905	135.322	227.542	50.2095	174.446	151.609	143.702	109.095	95.8668	150.237	0.363815	0.444888	7.48926
	111016073	144.291	103.739	77.8641	97.7372	75.6574	214.468	155.351	187.642	153.699	0.363169	0.419504	7.47184
	111005160	176.461	197.575	59.2452	149.461	108.127	212.619	161.244	76.4998	89.2056	0.404873	0.401617	7.46244
	111011527	125.162	45.6044	232.115	136.713	76.2924	153.269	95.4791	146.984	242.998	0.471066	0.479616	7.44991
	111022919	92.4212	107.631	172.044	119.377	67.4527	127.154	148.138	160.612	173.078	0.283593	0.281515	7.44976
	111008052	159.659	155.371	48.6035	131.021	114.765	189.361	113.003	131.108	140.523	0.29804	0.343813	7.44823
	111025140	81.7152	86.4467	225.548	191.329	186.251	139.174	94.9487	101.614	91.4453	0.409581	0.4608	7.44424
	111017552	109.575	68.6889	169.382	111.554	43.2226	162.925	247.383	119.188	218.047	0.480442	0.493406	7.43149
	111020264	163.733	112.56	79.6196	89.464	101.864	112.719	108.03	171.871	216.639	0.352731	0.457702	7.42186
	111008250	140.702	59.9488	153.954	73.2526	49.9388	197.745	199.628	190.901	155.306	0.441503	0.360218	7.40797
	111026041	149.566	223.47	59.3721	111.392	110.981	189.654	113.627	100.857	102.094	0.390117	0.475576	7.40458
	111004551	87.3524	78.1764	89.7897	115.008	46.6276	169.439	192.389	207.508	232.158	0.488063	0.468954	7.39612
	111019211	148.962	129.231	23.374	90.0091	99.7851	249.043	186.5	168.186	160.584	0.461613	0.494751	7.39317
	111016408	134.38	225.876	43.1431	126.884	145.004	123.693	101.106	118.065	137.821	0.369785	0.485284	7.38781
	111018851	58.6937	127.04	140.661	157.321	75.5599	114.617	107.392	167.802	182.145	0.328585	0.348674	7.38071
	111008742	126.292	156.326	47.9472	80.6546	80.6528	201.68	223.712	142.576	99.3772	0.453642	0.477282	7.35262
	111023995	180.246	211.129	40.8598	104.371	112.825	216.132	122.604	92.1113	84.148	0.465455	0.451555	7.3453
	111013530	207.221	217.624	30.1616	120.724	109.25	182.377	138.413	92.5502	89.2816	0.463807	0.442859	7.34449
	111023330	171.604	230.624	28.77	117.619	132.132	134.96	111.955	130.882	97.9789	0.422825	0.498154	7.33048
	111008400	140.386	229.737	29.4184	98.7984	117.77	197.586	126.804	121.809	101.372	0.44727	0.49184	7.32986
	111015034	112.439	157.54	56.6862	121.517	124.112	138.029	105.049	98.3588	157.22	0.263873	0.275252	7.32893
	111012708	75.0799	95.0688	122.764	111.015	73.5781	140.763	119.747	130.81	211.559	0.346159	0.486652	7.32622
	111004921	59.3214	80.1808	175.993	131.147	63.7395	128.753	96.8668	188.014	191.876	0.422495	0.398038	7.31681
	111018016	99.5364	130.683	105.396	82.8438	122.186	124.889	101.38	93.9725	171.914	0.231112	0.374041	7.3002
	111019739	117.643	206.176	41.859	100.177	169.284	156.408	158.256	92.4513	68.3913	0.429431	0.45164	7.29186
	111004503	155.826	95.4174	161.91	102.505	42.1328	112.999	108.794	144.166	143.004	0.316829	0.301429	7.28828
	111012161	147.201	112.713	82.9949	94.6348	64.22	157.216	105.866	127.012	144.872	0.273863	0.30071	7.28383
	111019980	77.8596	75.8477	132.306	109.084	62.1162	124.987	128.174	169.482	176.41	0.343555	0.376554	7.28212
	111013525	171.761	124.759	49.184	72.8021	57.0612	191.893	129.85	117.146	193.22	0.449234	0.408411	7.27787
	111008937	82.744	78.8957	210.675	212.444	68.6928	86.9446	63.6607	131.241	161.988	0.490419	0.479368	7.27072
	111009031	114.815	124.066	49.0005	79.9165	108.378	157.343	116.964	125.075	156.835	0.298197	0.304822	7.25807
	111018120	104.46	89.2088	61.2587	76.6812	65.44	168.101	174.457	169.311	150.979	0.404113	0.365577	7.25547
	111006970	147.189	147.036	37.0758	111.175	103.176	163.184	97.6976	123.574	115.222	0.318848	0.32427	7.25108
	111010212	53.3797	102.334	153.739	135.272	90.0776	132.268	111.507	120.177	114.012	0.258581	0.301556	7.24943
	111020274	41.3127	102.642	147.644	143.944	71.9974	140.569	79.4343	117.492	206.109	0.423065	0.487506	7.22308
	111025910	212.219	126.467	46.2608	102.392	107.789	213.77	117.798	80.0038	62.5519	0.499096	0.499765	7.22053
	111021025	139.752	172.672	55.7856	109.962	88.9068	133.563	83.7716	126.457	91.8238	0.317717	0.399135	7.21895
	111024934	91.3067	67.278	94.293	69.2833	83.687	169.719	164.752	128.368	138.761	0.352652	0.383004	7.21543
	111019150	59.619	58.9583	123.893	85.5552	58.7457	165.843	148.058	169.503	181.664	0.442329	0.401247	7.21371
	111010076	89.0682	87.6005	163.433	140.136	102.029	138.446	101.711	85.1317	74.4927	0.280919	0.37389	7.2111
	111021780	86.3766	111.959	80.2302	92.7077	72.8566	145.918	100.966	113.988	170.654	0.294798	0.410355	7.19816
	111018238	91.4036	127.77	48.4932	59.5175	50.873	161.276	178.201	177.703	167.406	0.474049	0.379604	7.19429
	111017687	123.47	78.7341	102.629	149.767	67.721	126.42	144.114	111.843	70.9674	0.282812	0.310681	7.19399
	111020599	81.5625	61.6688	116.208	107.164	45.5771	148.423	152.327	168.717	133.482	0.377949	0.372905	7.19292
	111021973	76.5914	109.867	134.291	102.789	76.8975	75.8031	89.5388	137.416	168.147	0.30266	0.402907	7.18699
	111025869	59.2886	61.048	135.387	108.344	73.673	148.686	121.749	125.844	155.585	0.335676	0.329934	7.18533
	111007797	69.3191	51.1354	183.798	152.815	48.5469	152.936	127.322	118.423	120.875	0.420696	0.427787	7.18073
	111017759	47.4917	123.823	145.763	128.297	67.3624	88.4736	82.0362	133.983	177.668	0.377438	0.425029	7.17252
	111004886	50.6928	95.5122	133.217	131.126	66.9866	111.733	90.2387	112.505	159.814	0.322079	0.380522	7.13725
	111009014	49.8017	119.682	60.5916	75.9141	82.3345	108.134	124.717	159.721	184.66	0.420559	0.471395	7.1157
	111021859	111.32	169.926	46.1198	136.888	114.02	76.4177	62.8533	97.3335	124.421	0.368707	0.434038	7.09559
	111012358	122.831	57.7244	181.468	150.801	51.9368	83.2603	139.797	114.241	52.355	0.445357	0.467572	7.07615
	111006864	75.1221	57.0342	99.9062	82.3589	95.1709	138.428	169.926	77.1453	113.654	0.347799	0.456514	7.07394
	111008752	89.3845	90.3063	42.7575	73.8673	75.5555	162.278	119.968	130.326	133.918	0.364611	0.417601	7.06501
	111007585	23.2591	63.3803	139.359	107.288	137.09	97.7132	115.545	124.611	149.366	0.380734	0.323606	7.06016
	111004723	77.0973	89.6204	130.683	107.224	86.8003	102.61	97.6897	86.6177	77.6675	0.177303	0.306215	7.04193
	111008928	72.0569	114.02	141.468	112.968	70.5632	80.4502	91.6434	88.0457	87.1653	0.243049	0.36654	7.02944
	111017782	113.622	89.3238	77.0283	80.0762	44.6438	112.485	82.9952	152.254	119.292	0.321289	0.409319	7.01325
	111018995	138.978	184.71	18.3725	97.3319	107.906	97.6365	78.8505	103.858	116.944	0.425594	0.485764	7.00959
	111014642	65.4702	102.319	34.7851	82.685	78.4764	146.955	136.518	108.721	138.463	0.378257	0.36423	7.00731
	111014560	56.0464	46.967	153.65	76.7048	94.3394	165.139	125.465	110.236	67.687	0.423618	0.446604	7.00584
	111013771	130.623	141.908	29.8382	81.6931	84.705	144.592	88.8522	85.5967	106.873	0.365306	0.351547	7.0049
	111007791	74.5097	55.0908	124.759	68.628	48.8616	137.24	118.731	103.659	147.614	0.377006	0.380582	6.99699
	111019198	88.8181	80.1286	96.4358	88.5324	71.2183	133.901	92.9524	82.726	92.809	0.190633	0.352487	6.99141
	111013135	146.622	147.806	33.9912	83.4233	81.2311	130.021	75.7672	85.8296	91.4739	0.38335	0.384024	6.98041
	111026092	128.288	127.168	36.3348	84.5934	76.6571	151.608	90.8677	88.3116	81.5968	0.357671	0.411462	6.97853
	111016070	145.625	158.891	26.299	95.9494	97.6279	105.335	73.9446	79.8091	103.64	0.394775	0.427099	6.97239
	111021901	66.8481	113.08	48.3396	90.2806	94.6825	118.242	84.673	77.346	132.54	0.2881	0.34596	6.95061
	111022410	120.426	55.6933	68.4201	116.923	34.0206	120.634	104.524	76.9258	173.414	0.436752	0.497181	6.94369
	111013702	136.744	155.979	39.2062	100.608	113.2	159.107	90.0935	58.5144	38.1137	0.471985	0.424555	6.94234
	111009458	32.3372	90.2617	135.344	126.478	71.416	137.009	112.146	88.6231	62.3992	0.376996	0.344016	6.94166
	111009154	61.0357	64.5344	112.762	122.015	72.9269	97.3375	107.838	86.1332	84.5165	0.240476	0.296107	6.94103
	111007150	92.6595	108.612	70.1828	81.1093	69.1581	72.4594	87.594	81.0284	147.984	0.277942	0.440139	6.94078
	111010265	50.2045	70.2861	80.7449	74.2116	50.3488	158.235	165.859	141.934	75.2226	0.476298	0.471549	6.93906
	111006730	114.061	127.771	51.5842	78.9846	88.8108	111.824	73.1471	104.193	65.9414	0.279467	0.326388	6.93801
	111005574	97.7226	70.754	157.637	110.483	68.3503	71.3648	83.4091	77.1084	77.7987	0.317244	0.479032	6.93668
	111005367	71.6555	137.958	61.3267	87.3469	74.0914	112.233	111.825	101.448	55.6451	0.302953	0.387883	6.92774
	111016758	151.122	98.5535	99.9541	75.3299	52.3445	99.3759	82.0144	98.1791	57.1884	0.323144	0.45165	6.92226
	111023600	147.642	65.9212	101.489	109.629	26.9233	82.0618	148.021	77.136	89.625	0.407895	0.408507	6.90739
	111021792	85.3052	112.974	51.6821	76.8969	71.493	93.5177	70.4791	88.8286	146.362	0.311264	0.443864	6.90058
	111011106	50.6707	59.8875	100.351	78.7393	41.2586	102.172	142.912	116.893	129.261	0.39202	0.4059	6.88898
	111005248	53.1089	77.0682	102.783	140.176	40.1697	83.531	62.6458	115.497	146.295	0.411631	0.423273	6.88237
	111006585	172.043	163.733	20.6626	86.1041	101.849	112.469	82.8031	60.7034	72.3843	0.494805	0.490891	6.88193
	111010174	133.236	136.227	16.5159	96.1286	106.76	136.091	80.601	65.1336	82.1232	0.415718	0.342469	6.85853
	111017375	70.6173	39.7281	102.876	64.6776	38.828	118.127	109.392	140.626	133.859	0.425278	0.397244	6.85476
	111006751	133.536	131.592	25.7231	89.5234	79.776	106.899	90.5489	74.25	74.3367	0.36686	0.370347	6.85123
	111006849	142.004	62.0285	102.782	78.9289	37.2238	133.03	134.586	73.9715	45.8041	0.440899	0.411676	6.84055
	111020730	139.803	48.2167	126.866	72.1689	24.385	73.2904	90.1674	140.852	113.048	0.447167	0.389479	6.83755
	111021902	93.4317	90.0738	146.425	120.65	56.949	75.3595	75.0164	61.9702	53.3495	0.359814	0.464914	6.83743
	111013535	152.561	88.6265	117.51	80.3687	23.1927	91.2425	58.3448	82.8343	116.412	0.4111	0.460437	6.83101
	111025496	40.3186	65.1048	104.79	80.7178	53.6913	70.934	101.297	121.189	145.537	0.389119	0.451994	6.83
	111008568	69.8222	47.0012	89.6664	77.4255	44.7801	136.206	119.505	103.547	86.5285	0.356286	0.414238	6.82756
	111017871	138.753	118.141	20.2096	77.6416	83.4186	132.534	61.1181	93.0022	91.5539	0.406666	0.389545	6.82669
	111018677	78.9654	108.75	62.7178	81.6342	71.762	82.3893	58.9694	65.9813	141.034	0.312328	0.458313	6.8208
	111012709	47.4673	102.644	92.449	94.752	60.5285	102.285	77.0986	82.1646	83.7075	0.226062	0.220057	6.81793
	111014533	44.8983	55.5824	123.726	92.0601	39.7416	90.929	76.549	122.711	144.393	0.423178	0.440589	6.81702
	111017748	88.1811	32.4671	91.1934	60.9004	69.8649	131.761	111.104	73.0385	112.41	0.354497	0.393637	6.81019
	111004734	99.3741	53.6986	96.9569	84.2126	71.0978	68.0838	86.7044	76.451	92.5295	0.185104	0.207874	6.80512
	111004742	35.191	32.7742	144.767	132.242	54.1578	92.3709	83.9213	88.8708	153.574	0.498631	0.459305	6.80156
	111007898	72.0302	63.3662	89.6421	74.1838	46.758	90.9199	91.5381	87.9056	120.389	0.255044	0.360047	6.79963
	111009806	49.663	55.5524	73.5515	59.0457	34.7347	130.008	100.881	149.776	138.777	0.487651	0.464022	6.78409
	111021904	58.5133	62.4409	125.772	89.8819	52.7995	79.7035	82.2528	80.8745	97.9765	0.27629	0.399268	6.78386
	111013959	113.229	32.4415	129.199	64.837	43.7502	71.664	101.869	113.26	98.2448	0.394026	0.381481	6.7782
	111007444	86.631	49.0076	72.7947	49.1067	85.6013	67.2651	78.4214	122.761	126.311	0.338022	0.394761	6.7736
	111015439	71.075	100.263	66.866	103.008	71.0894	83.1455	67.9048	62.5056	85.6541	0.187496	0.261585	6.7724
	111007453	102.901	89.6677	47.0588	48.6611	46.6269	116.309	76.684	105.549	111.543	0.349776	0.324331	6.7693
	111017667	42.7916	89.5716	63.8217	72.0948	68.8551	72.937	121.118	92.0665	100.354	0.28578	0.378198	6.76243
	111025466	79.3979	95.7869	73.7553	76.283	63.6079	115.456	85.7052	51.4913	68.1678	0.237332	0.356686	6.75485
	111023107	79.1012	83.1459	22.4505	55.8719	58.9775	133.773	110.416	120.589	103.244	0.416616	0.40777	6.74603
	111019600	59.5675	91.8484	48.273	65.7253	72.5896	95.5034	76.9568	87.4268	105.581	0.237286	0.292142	6.73872
	111023832	84.617	102.264	19.7439	52.3925	55.8654	136.76	76.7691	124.058	128.218	0.457178	0.411442	6.73498
	111007671	41.8085	46.6003	100.44	77.9993	48.6746	71.9906	105.115	110.995	133.578	0.397252	0.43514	6.73467
	111020459	48.7806	65.5654	71.3429	51.376	59.9338	127.434	87.1488	92.9938	108.287	0.338309	0.425755	6.72521
	111014295	70.3766	83.7472	35.6742	56.4902	109.377	97.5011	69.3836	91.014	92.6066	0.290805	0.317963	6.71575
	111009284	35.8949	52.587	106.791	75.936	47.2008	95.4714	109.021	92.8563	105.005	0.352595	0.298596	6.71412
	111009068	61.4867	45.5792	79.9163	90.934	27.9494	64.3588	103.248	146.246	130.398	0.464088	0.483857	6.71149
	111015324	71.5533	43.8066	110.368	49.494	19.5295	116.561	107.008	137.123	114.08	0.473433	0.423509	6.69541
	111013998	26.1167	60.2655	146.393	117.202	52.0803	45.4377	75.0559	103.93	129.986	0.497826	0.479078	6.6943
	111022740	108.448	66.42	30.1285	51.8318	37.3129	135.982	99.9076	96.1084	118.077	0.45392	0.440888	6.69408
	111020423	32.8076	40.5255	147.52	99.4155	34.7169	96.8437	122.145	97.7591	81.4418	0.482194	0.486801	6.6917
	111007815	67.5655	56.9813	100.455	68.0028	54.2664	94.8092	106.184	80.4849	51.7047	0.274312	0.32397	6.68142
	111009631	63.131	78.2047	131.704	89.3569	52.3462	36.996	61.2522	85.022	101.115	0.365154	0.461457	6.67997
	111020888	68.5475	76.6484	45.5081	56.7492	52.9535	89.394	93.6018	96.0987	98.973	0.269619	0.268107	6.67427
	111013036	82.607	51.9847	54.5241	41.8827	49.4511	112.064	98.6135	108.583	97.2935	0.361164	0.347538	6.67267
	111006771	77.2369	115.192	17.9877	66.18	66.3839	130.969	81.0775	88.436	84.5229	0.394636	0.430194	6.67036
	111024197	35.2168	70.0347	128.607	100.43	49.1802	52.8003	62.8924	100.094	99.2197	0.396858	0.446114	6.65801
	111012908	93.9975	113.209	16.5186	59.9092	66.138	140.017	68.1683	81.9806	92.7984	0.43025	0.470849	6.65458
	111025957	100.544	55.7982	38.6859	59.6323	53.5222	101.111	113.226	82.1418	75.684	0.338192	0.373905	6.65049
	111005865	86.1736	90.8939	20.08	79.3994	63.2916	105.409	72.6204	63.6864	119.625	0.366535	0.392315	6.63971
	111024174	64.8675	70.4182	59.4559	71.6649	55.2109	64.2059	85.6665	84.0116	90.1572	0.171684	0.229815	6.63503
	111025495	41.9391	32.5974	125.218	92.264	30.491	81.5243	129.242	101.816	85.7951	0.468763	0.427772	6.63343
	111014836	103.379	32.2075	50.3831	78.764	26.218	111.142	74.2588	114.519	134.211	0.475334	0.449679	6.63205
	111010786	67.0841	54.6576	90.2642	51.2825	56.7167	74.0699	76.2232	70.0453	115.136	0.274684	0.413365	6.63164
	111006423	72.0929	67.8827	116.165	106.507	48.1158	76.9901	60.491	58.8783	52.8482	0.320147	0.414835	6.62563
	111015085	55.6307	54.4799	103.04	82.1144	32.8995	128.047	90.0924	76.49	55.8773	0.387017	0.462478	6.62326
	111016592	117.004	70.4239	51.5722	56.1038	51.1136	81.0796	57.3913	69.6935	104.588	0.323339	0.420997	6.62223
	111011836	28.0635	47.5135	98.2577	76.1545	35.3428	76.7175	90.1506	121.722	138.941	0.476967	0.483663	6.6219
	111005177	65.4031	39.5759	55.5637	46.5218	47.453	130.462	75.5799	112.249	117.124	0.449716	0.463953	6.62156
	111020398	73.1908	71.6014	47.2854	71.2986	39.2297	91.2369	123.181	82.0583	63.814	0.333249	0.452315	6.62011
	111020345	132.295	114.679	24.5912	72.2788	65.989	94.6553	50.1002	63.4623	76.0099	0.424832	0.46921	6.61978
	111008357	69.7015	51.8661	56.7873	58.9402	51.5384	128.875	118.234	83.3587	51.0121	0.400494	0.474843	6.6186
	111007032	58.5524	42.7147	102.346	132.025	49.6228	57.5314	64.8656	79.6991	80.4321	0.381501	0.492745	6.61745
	111013565	104.185	53.8438	60.8825	53.9879	38.6165	95.7764	70.3703	90.4606	89.3707	0.310958	0.336144	6.61209
	111008303	69.2138	40.4176	88.8439	54.824	90.3442	76.4533	78.3928	107.381	48.7486	0.298405	0.362971	6.61136
	111020580	94.8024	131.161	15.9207	92.2374	86.5775	65.4616	50.6499	72.7395	97.2193	0.416011	0.451428	6.60477
	111020380	62.021	104.109	52.5087	74.2085	71.3673	82.3766	65.7715	62.6563	58.2171	0.219911	0.364694	6.59779
	111014391	78.7833	107.512	18.3842	56.5088	66.5035	104.549	85.6505	82.7606	80.1412	0.354737	0.333471	6.59445
	111013781	76.5142	35.5588	72.3075	58.4528	27.5639	77.4732	83.9781	134.932	123.966	0.463821	0.485096	6.59324
	111022154	98.2369	43.7729	46.0626	36.6783	99.0102	108.588	74.2038	111.175	53.5175	0.404878	0.370282	6.5932
	111017439	71.9843	42.835	71.9163	64.4903	29.8595	63.3908	79.3371	133.259	109.774	0.425479	0.499482	6.57825
	111021927	74.944	108.42	13.8555	69.0598	81.8532	113.768	71.5135	68.9398	87.261	0.375315	0.367304	6.57688
	111014797	74.0682	82.5518	127.548	109.477	53.5542	50.8693	54.5133	46.4596	51.9575	0.401614	0.487006	6.57408
	111005275	41.2118	99.1156	50.6029	82.5715	47.5229	47.4725	66.9318	112.79	105.132	0.384643	0.400921	6.57383
	111024479	108.298	83.6561	105.688	86.3038	102.109	46.0643	52.4586	52.4635	28.4711	0.399923	0.356851	6.57328
	111015952	125.8	112.513	16.369	66.4727	82.1825	101.487	61.6862	55.4583	65.1968	0.436606	0.442204	6.56348
	111006378	35.4488	38.8128	111.831	97.0812	34.7708	85.3012	106.782	100.238	59.4031	0.43366	0.376475	6.56077
	111008242	32.0167	33.5308	124.918	90.9756	41.9785	85.8336	91.9591	93.2179	73.5068	0.429762	0.456625	6.55808
	111006395	66.4633	47.9333	119.124	62.2246	25.1983	53.4944	64.2375	121.571	109.664	0.459085	0.436193	6.55552
	111010381	56.0636	56.3578	62.5221	58.4486	43.7404	100.157	109.205	76.2785	63.6285	0.31249	0.407996	6.55284
	111015783	40.1196	113.143	39.5001	50.0777	66.7009	49.6594	94.5259	109.408	85.5761	0.406388	0.408307	6.5499
	111018963	100.578	90.5978	35.0261	51.4429	38.7604	129.995	112.681	84.9963	33.1509	0.485082	0.473795	6.54956
	111025235	46.4158	67.0619	43.9789	55.4745	46.6474	72.1792	69.3561	120.541	120.645	0.41761	0.459515	6.54662
	111006069	48.4178	65.7352	43.7265	50.0827	47.4089	71.0312	76.5888	118.602	120.717	0.415759	0.459899	6.5463
	111021750	79.0026	99.0582	28.1604	58.1034	82.3583	77.102	47.3745	71.4452	82.9543	0.309419	0.335617	6.52708
	111024975	60.3017	37.8087	80.2133	57.1262	23.152	99.5509	124.682	88.2356	84.1016	0.432206	0.468158	6.52316
	111023799	76.1357	78.2831	22.4088	58.5025	73.1799	76.3152	73.5468	71.1055	95.1071	0.287933	0.304104	6.51897
	111016496	53.0075	54.4883	55.3702	41.6498	60.3159	86.5485	71.7565	82.4968	100.533	0.284782	0.371308	6.51133
	111021220	132.358	110.53	11.6514	59.5253	59.2997	122.629	62.1059	72.2924	61.4198	0.496371	0.471647	6.50862
	111014534	79.7768	51.658	49.5941	50.9834	32.9902	81.2701	89.3965	73.6786	108.14	0.346976	0.411239	6.50506
	111024097	36.4998	72.2265	60.6061	61.5055	45.0208	100.66	53.9764	67.5416	121.607	0.389928	0.488067	6.5038
	111021846	63.5409	41.8417	69.3428	53.0433	47.5311	86.6512	84.4631	71.5769	79.446	0.243358	0.263158	6.50053
	111014320	38.2276	58.3743	76.0279	66.91	58.1702	76.768	93.5542	50.4931	79.007	0.254029	0.326623	6.49696
	111006298	50.8704	83.2282	52.7935	33.8076	35.3388	115.024	80.6848	92.256	82.5805	0.397988	0.444073	6.49664
	111024374	51.0465	50.1398	111.03	90.1288	47.8551	54.6732	46.3247	62.6421	92.7531	0.357286	0.442083	6.48931
	111020096	38.7982	31.3994	60.2407	62.1034	32.4162	120.458	77.8313	104.89	120.414	0.499422	0.451996	6.48441
	111014183	98.9085	29.7673	79.4529	50.509	33.2187	120.067	116.22	59.1857	53.5658	0.478625	0.457772	6.48321
	111013996	111.747	56.884	105.269	101.076	40.976	35.1831	85.9495	49.094	41.0089	0.445482	0.42343	6.47861
	111008489	71.8904	68.6204	63.0382	74.2823	43.2453	73.6716	49.9901	57.598	79.1429	0.187801	0.206599	6.47764
	111024966	83.127	41.8245	76.7596	56.8619	41.6457	49.4651	61.2637	106.353	81.5807	0.329011	0.421115	6.47616
	111011008	63.6462	50.305	76.7326	83.7489	30.9922	88.3521	88.9633	60.139	51.7821	0.301319	0.289457	6.46613
	111019550	37.3673	54.7641	100.681	68.0481	42.0503	82.8397	79.7553	82.529	48.0865	0.328742	0.384888	6.46457
	111005727	86.8088	39.7486	91.0431	56.707	39.3221	54.4981	68.512	64.419	89.6386	0.306909	0.313987	6.46085
	111018225	71.575	24.858	107.84	90.9634	50.5585	50.4528	65.5071	90.6914	54.0718	0.382384	0.42197	6.45211
	111025546	36.3233	47.8209	103.408	86.7507	72.8278	97.0624	88.3547	58.6888	24.2989	0.410093	0.38094	6.4473
	111006286	102.232	109.41	81.7007	72.2234	78.9587	43.8369	58.3023	74.2511	13.5281	0.414808	0.400151	6.44142
	111019214	84.7748	58.3614	63.8257	72.2343	41.6127	56.367	52.1388	54.7634	86.937	0.239035	0.303981	6.44024
	111019696	41.6919	74.7873	101.479	65.8416	47.9019	46.259	57.9927	66.1911	70.7655	0.287612	0.4193	6.43104
	111021187	31.3364	67.9746	115.542	68.8659	47.0835	31.6757	49.6071	85.3036	102.188	0.4488	0.476345	6.40902
	111007833	65.0047	97.6145	29.8666	45.9342	46.7498	95.7874	57.3743	71.1552	68.506	0.35015	0.384853	6.40861
	111015041	44.6448	79.643	94.588	74.8563	61.2877	58.046	55.5333	49.2849	44.1814	0.275897	0.382219	6.40754
	111017400	21.8518	34.7027	72.608	45.3143	113.047	80.432	76.6222	97.6177	63.4513	0.437233	0.455316	6.4066
	111015913	43.3162	53.6916	44.7402	38.17	39.6843	77.3087	75.4492	107.486	107.822	0.428674	0.443705	6.40492
	111025297	21.8301	46.6525	105.861	66.8798	71.772	69.6535	40.1762	62.2997	117.87	0.451595	0.485529	6.40462
	111016569	81.2929	69.6255	34.8409	51.3164	56.0906	73.5872	63.8085	52.991	74.9355	0.235123	0.26624	6.40385
	111012033	67.6976	52.9336	25.7145	47.133	84.2833	89.4185	64.7045	70.1663	68.9331	0.305437	0.326809	6.39862
	111018043	84.0655	88.0124	47.2575	49.8977	41.7152	66.1106	53.3729	52.6746	71.4257	0.269424	0.337423	6.38924
	111008723	54.7643	42.0511	82.1242	36.1666	29.7038	67.1775	76.9371	79.1395	116.26	0.420986	0.496747	6.38924
	111015960	36.7014	82.8287	48.9942	43.4899	59.9126	50.4465	69.4018	73.1863	95.9117	0.313443	0.394024	6.38716
	111006397	54.4389	33.8625	89.6461	45.7553	30.1061	71.1479	62.5844	98.5037	94.1567	0.398889	0.388731	6.38486
	111007628	57.3348	56.8729	65.0779	63.9398	44.491	79.361	73.0978	40.2455	65.0761	0.206874	0.265798	6.3809
	111025341	41.0143	25.3201	107.628	63.7255	25.1335	61.2086	68.0974	98.6837	110.616	0.495392	0.445367	6.36187
	111023183	55.1546	26.5408	86.2782	54.3459	59.552	52.6326	50.4973	80.4244	92.2273	0.334249	0.369187	6.36015
	111005029	57.2969	47.63	82.4775	40.0041	40.4667	50.294	52.1722	95.4328	87.4584	0.344734	0.400364	6.35859
	111024455	86.2773	79.0636	24.14	50.7681	43.735	82.3473	64.0377	61.7109	66.8247	0.32282	0.31525	6.358
	111018618	26.4388	48.0667	88.9493	76.3578	44.6036	53.6449	48.8167	81.5806	90.1468	0.365318	0.350423	6.34681
	111010427	48.7726	31.9581	88.3079	96.1406	23.6908	37.274	63.5011	84.7733	113.965	0.487705	0.479644	6.34141
	111017623	94.7322	109.517	6.05962	57.1266	53.8933	127.693	65.111	72.8596	59.3266	0.495555	0.492312	6.33657
	111016315	45.8917	56.7627	50.839	58.6674	56.1264	49.8528	63.9745	59.2441	82.5907	0.18333	0.332009	6.33305
	111016282	56.2779	40.8193	58.8261	33.5705	86.8383	93.9428	56.1677	52.0198	62.59	0.324208	0.405077	6.33218
	111022807	38.2174	53.9786	38.7663	34.4326	38.0704	110.411	105.691	78.0838	67.5425	0.472324	0.485124	6.32451
	111009481	60.4744	25.9575	61.7858	42.9871	23.3989	71.4676	71.2499	116.064	107.872	0.49859	0.498989	6.31863
	111017801	11.8818	42.2175	74.4925	83.3936	69.6805	34.6809	99.5561	88.1616	92.4747	0.452008	0.376001	6.31584
	111007226	46.8005	76.9976	42.652	55.6364	42.2049	95.71	51.9995	56.4496	59.7373	0.297348	0.435171	6.31439
	111023239	50.8898	64.692	39.4568	48.7432	44.7924	77.7111	80.4147	62.9792	50.434	0.250153	0.316514	6.30265
	111016616	80.254	52.8058	49.1508	32.6236	30.4071	68.162	50.7763	83.108	90.767	0.366313	0.384016	6.29582
	111019638	62.6713	62.0355	31.117	60.014	33.9455	68.6943	51.9259	64.4235	93.0894	0.316849	0.416116	6.29214
	111012492	76.7465	49.1228	27.7016	39.1916	35.0439	100.155	74.0509	72.7182	63.9618	0.395578	0.452679	6.28197
	111006639	31.8429	52.5745	93.2825	84.2675	43.191	73.7967	49.8072	42.4244	53.2271	0.356353	0.422278	6.27433
	111006432	74.6514	38.9307	91.2519	56.2608	19.3142	55.3102	48.1655	79.5014	73.87	0.376379	0.389048	6.26706
	111014056	53.8463	55.7401	36.9382	49.5897	47.9484	66.035	61.954	75.7391	53.5006	0.201248	0.297667	6.26206
	111023875	51.4645	74.8039	18.6274	36.7682	50.0258	85.4206	56.556	86.4584	76.4515	0.387524	0.349227	6.25615
	111010792	65.986	57.3278	37.1594	41.4114	35.1312	75.2749	59.5314	70.0288	65.4388	0.264152	0.282605	6.25568
	111013762	96.7823	89.7178	17.6164	60.0985	55.3605	73.4945	46.1282	47.01	51.1342	0.404894	0.430991	6.25368
	111018712	82.6393	98.2113	33.6797	62.612	56.2568	50.1297	42.4441	34.3308	58.6184	0.373156	0.464533	6.25272
	111024880	17.9867	46.8205	57.9519	52.459	103.287	52.1394	47.7893	70.494	87.4872	0.417296	0.475818	6.25041
	111024000	66.6422	61.817	19.1936	34.9439	44.9449	75.1942	67.5675	88.1526	70.1896	0.367967	0.375383	6.24398
	111015021	30.8761	55.0432	30.6606	39.0923	40.9848	63.1584	84.483	87.8989	92.7175	0.427145	0.417319	6.23234
	111023759	52.8627	92.7222	54.5006	59.0068	70.2131	70.5533	60.3725	33.9913	22.2159	0.359856	0.428783	6.22919
	111012175	61.2243	42.1564	100.847	104.5	46.7187	26.9816	50.9234	36.208	54.1556	0.46623	0.498549	6.22294
	111005111	38.0225	47.716	94.783	71.3555	27.2759	64.4396	69.6222	43.2499	52.1817	0.364145	0.454196	6.2213
	111009495	51.8292	64.929	27.418	38.7154	39.9642	86.8989	43.4322	82.9638	70.4578	0.372538	0.396267	6.20956
	111017056	34.802	28.5494	94.7748	58.3569	24.0843	67.3824	100.706	72.4096	47.9064	0.470751	0.468423	6.20781
	111024160	75.2326	79.7553	22.375	49.683	40.567	60.0951	41.8808	58.1165	76.8868	0.345382	0.334156	6.20405
	111022874	35.2669	47.9503	61.0255	58.4972	40.784	47.8567	54.5315	57.2605	82.0413	0.251149	0.385717	6.20274
	111009501	64.4506	73.8581	20.274	37.1778	34.0053	97.5461	76.6481	72.7713	44.5099	0.433274	0.457058	6.19933
	111023409	40.8653	51.7197	45.5764	55.1171	40.9041	38.4873	68.6185	67.2842	75.9979	0.257351	0.327987	6.19813
	111012045	41.844	43.7018	83.6798	57.9364	56.473	67.0817	49.4753	38.4519	45.6961	0.267535	0.401498	6.19741
	111012619	34.8469	46.4196	98.2724	78.3499	39.7468	41.27	36.9804	58.0108	64.1252	0.39046	0.491529	6.1913
	111026079	44.494	33.8833	63.8496	51.8379	48.9092	31.2979	67.9751	70.9226	74.6947	0.295135	0.30857	6.18785
	111005179	43.2019	51.5966	69.5456	52.8613	70.0332	80.3645	40.8383	33.8457	42.4772	0.295708	0.370991	6.18534
	111007072	46.471	29.3213	43.6793	34.5092	30.1443	65.8804	94.8017	91.3272	73.3004	0.451795	0.453289	6.17812
	111021670	66.42	25.7055	70.8178	42.7733	28.1182	55.6707	41.8519	92.5057	80.1979	0.414755	0.443879	6.17341
	111022288	58.9325	41.218	37.4745	38.7944	44.3936	73.0972	72.4693	46.2336	64.6509	0.271262	0.308853	6.1714
	111009040	85.7392	61.3619	98.0135	57.7268	40.9421	88.337	60.7795	22.953	16.0641	0.485138	0.446628	6.16684
	111013646	18.4158	54.1147	64.362	57.3701	52.4061	30.5251	54.7102	95.3035	78.3088	0.407623	0.461965	6.16623
	111010485	88.8614	46.1847	45.6593	42.0512	28.5758	35.6411	45.6103	71.0317	91.8495	0.418937	0.450711	6.1652
	111010715	66.2418	31.7878	81.4477	45.0313	24.8077	50.8555	69.899	63.8085	54.1577	0.338013	0.375996	6.16286
	111016923	51.1633	42.8663	66.6522	49.0846	48.8918	43.1998	37.4418	49.1106	82.4219	0.265151	0.410941	6.15895
	111017264	60.3408	49.2653	32.267	44.8796	53.8199	70.2744	52.9088	61.4068	41.5245	0.221279	0.294884	6.15179
	111023917	36.483	53.2204	91.9645	53.8901	20.7157	42.5901	52.2013	68.8144	71.5896	0.383883	0.456985	6.15082
	111016833	24.8037	53.0612	33.179	40.4263	28.769	84.5533	55.046	97.0333	91.9007	0.495348	0.46959	6.14519
	111018967	40.5113	57.2616	40.9356	40.6151	26.368	73.8251	52.7409	67.0312	78.845	0.331468	0.366972	6.14403
	111026030	31.9123	42.6464	43.457	33.0717	30.7152	57.7207	76.5306	84.2842	93.4825	0.441693	0.464689	6.1439
	111019202	72.94	88.2393	33.3345	54.6548	7.60388	94.1193	51.8516	66.5044	70.2744	0.450254	0.40846	6.13944
	111011468	47.2254	38.2507	71.898	63.9145	27.4777	63.3031	69.2764	57.2946	33.4601	0.312319	0.304218	6.13002
	111017509	45.0962	22.223	45.7501	34.3061	26.4072	91.5474	72.3021	77.3118	87.2936	0.477224	0.439239	6.12474
	111010088	32.1953	36.5736	75.5005	50.4491	27.9098	51.7577	50.0633	61.716	89.1492	0.380912	0.458541	6.11849
	111020872	59.2258	43.7138	49.1371	46.1854	43.1105	37.1621	35.4265	66.6549	75.28	0.268256	0.368	6.10817
	111012321	31.5727	37.5532	42.73	36.3574	30.4351	52.2202	77.9904	88.9666	82.1425	0.437571	0.450634	6.10772
	111018756	30.0379	27.5386	66.5986	48.218	19.7149	59.3016	71.106	87.7613	82.9236	0.453154	0.422526	6.1017
	111009887	63.4234	85.2944	17.1965	49.1265	43.9849	60.1534	58.4843	50.4115	43.9427	0.350088	0.433252	6.09761
	111007215	73.035	50.891	67.8641	61.0205	47.7069	39.8218	38.2735	39.7777	35.0623	0.275791	0.348912	6.09703
	111009685	72.1467	33.0945	31.5041	40.0917	26.7231	60.1191	65.4909	57.6609	82.3109	0.381436	0.412545	6.09129
	111024799	48.9642	28.9983	79.481	54.6455	23.5906	45.8857	59.4736	60.2874	61.7081	0.333914	0.396785	6.08817
	111010984	38.2474	34.2381	77.4645	49.1658	38.2345	41.3576	57.9071	47.56	67.4962	0.292933	0.396165	6.08698
	111014408	67.8453	61.1983	31.4413	57.6783	48.0754	71.7117	33.8756	34.9888	46.0345	0.29997	0.335643	6.08146
	111013951	92.3027	92.2123	23.9879	46.665	52.8093	35.8492	63.8029	36.5769	33.6203	0.471834	0.477908	6.08132
	111022722	31.1581	40.4326	34.1823	35.802	41.0747	59.3182	54.4503	80.0237	86.3685	0.394389	0.455181	6.08115
	111018868	29.4048	34.854	36.5523	32.4784	93.544	51.3248	61.9037	79.2646	48.7415	0.430094	0.499535	6.07925
	111013083	69.2668	31.2614	38.1827	39.2994	25.3793	76.6804	53.0731	47.8507	86.3876	0.408434	0.448714	6.07813
	111023390	25.8193	46.8278	77.4089	49.0013	22.0214	72.3125	63.7696	46.7955	63.152	0.371117	0.370712	6.07685
	111010278	49.1659	16.9754	47.0871	70.2678	15.9292	78.1379	88.837	77.7583	57.9606	0.470123	0.418482	6.07684
	111013598	30.0149	46.5965	36.697	47.3743	35.7397	48.5832	64.2955	61.177	81.1426	0.322803	0.42928	6.07346
	111005858	40.207	23.5851	41.3275	41.1301	20.8949	80.0881	93.0212	76.5097	69.8154	0.484872	0.471145	6.0726
	111011338	44.7705	77.8761	38.8131	46.3004	36.0431	55.4232	43.1948	53.3578	43.3669	0.256789	0.420121	6.06155
	111004603	16.0777	46.5869	51.1732	43.7333	27.7539	84.82	67.5564	71.114	65.8866	0.415861	0.425427	6.0613
	111014724	36.3962	64.181	38.0055	51.9583	40.6043	37.4852	45.611	47.9324	81.2265	0.302136	0.442649	6.06101
	111019630	30.7318	20.7088	65.2905	53.2506	39.1659	71.4528	55.1732	61.4072	58.5544	0.333215	0.327734	6.05863
	111011849	50.1112	26.9241	73.1407	39.9833	27.6486	38.6453	55.1546	68.3486	77.0888	0.374167	0.383898	6.0582
	111009335	45.4149	27.8702	68.4821	43.04	34.0503	56.4111	41.6892	69.2086	58.0317	0.294928	0.322719	6.05486
	111007151	35.1192	79.4439	55.8036	67.1429	31.3913	46.9423	38.0888	32.7355	62.417	0.34462	0.418393	6.05472
	111024345	43.9847	46.1383	42.9426	41.952	27.5303	66.5079	50.4219	53.4028	65.236	0.248563	0.30157	6.05162
	111013617	31.3673	35.4487	55.7402	38.8698	22.0063	64.6032	86.0797	60.0011	64.6282	0.399659	0.458837	6.04711
	111022646	20.2816	31.9266	68.1394	45.7401	79.1071	48.4196	45.0615	68.9101	47.564	0.369384	0.405801	6.0469
	111006471	61.1496	53.0532	40.9984	44.6962	36.2567	47.0089	37.3923	58.001	51.1685	0.184268	0.246571	6.04445
	111024881	53.4158	30.9503	43.1339	39.9835	25.203	89.9895	61.0116	57.1622	49.7938	0.380811	0.499033	6.04425
	111024920	61.4866	33.9547	63.845	71.1253	23.4102	46.283	39.7082	51.5189	52.7225	0.309035	0.344592	6.04208
	111004557	37.0938	28.876	46.8434	32.3486	25.583	68.7399	72.6899	74.4813	71.1431	0.407435	0.356688	6.04085
	111011513	47.3947	45.0683	64.6739	52.1794	36.2161	35.2578	40.4225	48.9995	60.149	0.21061	0.29321	6.04043
	111008017	60.8211	49.7855	62.3222	63.5721	49.6514	44.8007	42.947	27.9562	34.1104	0.257697	0.267771	6.03989
	111010320	53.7834	64.2265	21.0788	31.7415	42.7442	77.9087	72.7531	49.042	39.7863	0.374277	0.398084	6.03985
	111021238	14.4403	61.6956	32.1422	85.8012	65.6999	46.0701	58.7766	58.3945	42.1914	0.401552	0.447253	6.03753
	111006251	38.754	72.4512	50.9227	53.287	59.4055	26.4564	42.7158	30.2142	64.0993	0.317531	0.36879	6.02414
	111016533	52.1512	59.475	29.6399	38.0419	37.4976	49.1892	65.1923	54.3832	43.1108	0.241196	0.303045	6.02339
	111020989	27.1143	58.3319	17.8614	45.1162	41.2702	61.4266	51.2399	70.0919	84.262	0.408085	0.447479	6.02206
	111018713	40.6924	27.0905	41.2889	45.1298	49.089	84.6444	41.5467	58.9101	46.1211	0.33168	0.483326	6.01969
	111022123	34.0367	67.1988	34.6371	51.5257	88.8064	41.5394	27.9178	36.494	62.6925	0.404296	0.498851	6.01941
	111006416	44.5638	49.5645	61.5008	38.5558	39.7903	46.6157	62.7522	57.5187	27.3887	0.244918	0.271942	6.01917
	111024837	34.8953	45.6023	81.4245	50.2626	35.2719	68.1861	58.7354	35.9982	28.9104	0.361239	0.450623	6.01868
	111004737	60.3738	61.2628	35.9476	29.9448	36.239	64.4464	83.2798	32.2246	37.8425	0.381018	0.462232	6.01647
	111011490	28.6351	37.7122	40.9856	33.7419	32.7581	48.6625	72.2844	71.7691	73.8601	0.381061	0.379657	6.01092
	111025641	33.8175	33.8521	73.481	81.4195	18.6261	52.4291	60.3802	28.5202	78.8503	0.459473	0.416669	6.01022
	111006666	75.0562	44.3503	41.3445	44.838	35.0011	67.8351	65.7647	36.2049	25.9226	0.349911	0.398349	6.00953
	111023498	49.4302	57.4085	72.0211	55.5696	43.5154	26.703	43.4153	39.5275	39.574	0.274683	0.383612	6.00809
	111017408	60.4209	66.716	6.02688	38.6432	44.1967	80.4615	57.9589	56.826	75.7907	0.414999	0.368363	5.99644
	111021162	39.4478	29.5259	63.3741	41.3819	30.2563	53.0936	61.7834	59.4827	45.3862	0.276572	0.289225	5.99354
	111011509	11.7609	57.3583	33.1121	63.3342	55.4023	28.4328	66.6762	72.4462	75.2827	0.426995	0.354894	5.99195
	111013917	44.1931	57.3318	38.7397	52.4725	40.8888	59.2981	32.6564	40.3816	48.369	0.194961	0.251594	5.98919
	111018295	23.3402	30.4097	84.6742	39.7297	40.4402	29.171	55.7627	71.0611	70.7665	0.442354	0.467546	5.98784
	111015470	47.051	40.6852	55.8779	35.8916	35.9902	66.1808	69.0847	43.296	28.4791	0.298927	0.360474	5.98561
	111013964	41.7943	27.836	68.4378	32.0946	15.0233	54.2739	90.8587	56.1639	73.0602	0.474189	0.492778	5.98517
	111004937	66.2516	45.5482	41.9159	52.1984	41.3692	45.3533	44.4348	38.173	35.8382	0.197848	0.349391	5.98019
	111024190	30.78	46.1475	34.2389	40.9119	34.9287	59.8333	60.3007	51.9741	57.7482	0.251677	0.260865	5.98009
	111014828	37.7977	53.256	49.7791	35.9533	33.2683	38.2702	50.0662	65.4337	49.7961	0.226335	0.334848	5.97917
	111019453	47.4796	50.8835	23.5266	37.8654	33.1113	59.9811	44.4321	48.3604	81.2073	0.348705	0.467967	5.97865
	111018294	22.37	35.7992	36.3844	40.4757	34.2965	65.0837	59.9481	62.8538	73.3147	0.368132	0.390962	5.9746
	111009565	45.0028	38.256	45.3727	55.3815	19.0714	82.2014	65.6972	39.9802	40.561	0.376335	0.4688	5.97356
	111012063	71.2253	30.0005	47.999	64.2543	41.9795	66.8282	34.5823	37.7892	29.8682	0.345535	0.379958	5.97336
	111023935	34.3236	23.1368	43.7418	40.6189	64.1572	42.9987	52.9563	49.7948	69.7197	0.306786	0.369389	5.97202
	111021313	49.4772	79.9493	42.8998	50.6693	66.48	29.3533	36.554	27.6829	40.3979	0.363392	0.462919	5.96522
	111005648	51.0644	87.0098	36.727	53.5667	40.465	67.6087	51.2899	18.763	28.9106	0.423569	0.499488	5.96034
	111011540	29.4152	30.8688	53.7355	42.6125	29.9378	61.5825	55.934	43.4787	70.3404	0.320511	0.382352	5.95801
	111006032	29.0911	65.4523	63.1043	62.9746	43.239	23.1085	28.3831	44.5553	66.4361	0.372407	0.32283	5.95291
	111012483	61.2532	65.6459	18.0983	38.3717	43.8746	58.4178	43.5772	40.9047	47.0467	0.309426	0.330605	5.94383
	111005064	54.9035	65.7224	3.68537	33.4322	48.8349	94.8784	62.6228	59.1033	77.2072	0.467571	0.465748	5.94071
	111011951	61.3887	39.77	28.6126	25.2333	20.4259	53.9793	67.8374	74.3968	58.8955	0.414541	0.401616	5.93769
	111010138	29.2273	27.4644	52.4534	40.1004	44.3887	38.8639	28.5694	80.7135	85.1125	0.457971	0.498045	5.93601
	111011899	44.5073	56.9347	13.9375	24.6618	84.2341	67.3781	49.2067	52.6191	44.3388	0.431063	0.475296	5.93485
	111026167	30.5333	26.6094	44.2918	30.9023	24.4222	78.2269	65.4842	64.0706	62.3079	0.428495	0.442932	5.93139
	111018387	69.3562	60.5325	17.3912	46.5653	34.0657	57.1146	35.0441	48.8036	48.1298	0.338928	0.373439	5.92822
	111019735	30.0647	61.679	16.4714	38.6043	52.4839	58.4297	36.243	48.7796	84.0736	0.418883	0.490394	5.92612
	111018992	30.9697	11.4467	61.222	66.3225	21.2801	65.506	64.7923	66.4234	62.1389	0.443861	0.277969	5.92587
	111016281	62.8516	18.4916	39.7584	35.5105	18.0245	67.7971	62.0855	64.8181	65.0127	0.42564	0.324173	5.92224
	111010917	16.4047	42.6068	24.2221	31.6684	61.0257	76.381	54.5662	71.9709	52.3923	0.434753	0.419265	5.91903
	111020737	15.1452	28.1937	62.6042	30.2623	61.6819	78.1403	69.2443	63.5801	29.3235	0.466905	0.424056	5.91562
	111016752	43.333	42.8929	58.718	22.8092	14.9676	61.0883	51.2437	56.004	76.6361	0.404246	0.427397	5.91473
	111020907	65.1382	69.9645	24.7789	40.809	39.293	22.9843	43.4761	52.267	52.732	0.352949	0.389908	5.91413
	111012850	26.448	45.4741	45.1887	36.525	30.6193	58.6141	40.2631	57.2876	60.3076	0.276682	0.294409	5.91312
	111014402	17.8217	44.0932	32.6105	36.094	30.4917	80.2321	63.9866	56.6182	59.6107	0.420437	0.46822	5.91087
	111024831	39.4099	31.3286	40.7749	44.8268	46.9922	68.179	34.944	36.494	51.4137	0.252501	0.401971	5.906
	111010710	25.1096	20.8014	56.3736	34.2382	35.3818	64.5907	63.4204	58.418	55.166	0.37044	0.324769	5.90493
	111011879	60.469	37.5074	30.0398	33.5495	41.7493	43.5783	39.6465	49.0079	55.7653	0.230388	0.316088	5.89787
	111010565	42.6622	44.0321	21.8297	33.7559	30.2028	48.6183	45.913	62.2053	77.5041	0.371493	0.469029	5.89763
	111010385	25.1904	21.3069	78.9715	77.3941	16.2675	47.6721	72.8131	51.6936	46.3853	0.497943	0.432195	5.89556
	111011355	33.4973	39.0217	52.7544	34.8104	24.0532	57.6477	60.5693	42.1042	51.2556	0.279836	0.308345	5.89224
	111007992	37.0146	18.2903	81.8616	37.7023	18.3164	48.2007	54.4691	63.2937	68.325	0.46029	0.472262	5.89205
	111007928	40.8571	78.2179	10.681	46.1552	17.0244	82.5268	58.1097	50.1378	66.974	0.496229	0.442368	5.89108
	111015478	61.3441	40.9811	36.4422	27.5533	25.759	40.0564	41.3925	57.3388	68.9118	0.336706	0.399835	5.88886
	111009964	40.5159	32.3195	31.4622	29.8149	29.3464	51.6343	66.4396	70.2572	48.8665	0.354663	0.412161	5.88832
	111022821	19.7131	46.894	37.9537	41.1414	75.4344	52.1156	46.7744	40.7229	38.9454	0.332024	0.462678	5.88696
	111017442	36.37	27.5858	48.1914	38.1115	21.0415	54.784	57.3444	66.346	51.254	0.331973	0.369437	5.88437
	111017226	52	84.5587	11.5099	40.4528	57.431	39.2702	40.5525	32.8712	66.4915	0.444513	0.496535	5.88244
	111021636	34.1729	35.2035	60.94	37.0627	27.6404	27.2487	39.1141	69.2757	73.3523	0.399619	0.436524	5.88146
	111012586	31.1816	22.1774	52.9773	42.0996	25.898	52.7478	78.0858	50.8413	46.8134	0.382141	0.480161	5.87536
	111018596	64.631	49.5329	48.2957	58.804	60.4568	40.9783	50.2508	18.8125	18.334	0.370814	0.331851	5.87487
	111020597	44.3063	41.4574	51.8032	34.3989	50.431	51.1207	50.744	35.4927	24.8887	0.222046	0.196864	5.86981
	111021748	46.6011	58.1937	17.2494	30.1584	39.9892	46.6909	48.8676	44.3166	63.7409	0.316732	0.348795	5.86348
	111016605	62.1175	69.5267	27.3145	48.3556	32.4208	36.2235	30.58	29.3354	57.128	0.36554	0.418433	5.85428
	111006804	45.8229	44.6159	58.6701	36.9351	42.1924	36.1123	43.1732	35.3809	32.6897	0.187712	0.324779	5.85133
	111022666	22.9385	34.7048	70.7052	37.7398	11.5678	69.498	76.4234	64.7051	39.3247	0.49221	0.425595	5.84895
	111019690	17.8789	28.304	34.5564	44.2373	60.3095	60.8614	40.8185	50.618	56.4408	0.340373	0.315734	5.84848
	111021264	72.3577	72.692	18.279	53.3205	44.7404	38.0755	33.6605	22.3378	49.3873	0.43106	0.428825	5.84514
	111020275	22.4658	41.7726	32.9958	42.5197	28.1499	55.7349	51.4452	49.21	61.4113	0.303661	0.339915	5.84358
	111013897	30.9512	41.5392	45.8826	39.6189	43.0232	35.4834	53.287	56.2359	29.6441	0.219028	0.289978	5.84147
	111012851	13.9504	71.7553	43.4142	55.8962	43.263	71.8085	22.7407	29.33	62.4308	0.457776	0.403308	5.84009
	111009881	34.0926	29.9361	38.1781	29.4968	20.1484	54.9284	72.8882	71.0893	46.4745	0.424083	0.443764	5.83599
	111018154	31.9888	32.1972	40.4954	39.6034	25.6451	57.3532	57.9573	53.1316	40.4471	0.277117	0.307978	5.83404
	111006962	36.4762	19.1319	73.7719	42.1165	16.6784	60.1172	47.6921	38.6168	68.8582	0.447918	0.441373	5.81912
	111018187	45.8601	29.8273	67.3582	40.021	30.9924	47.1361	55.1968	36.4901	25.3641	0.319101	0.423069	5.81883
	111010084	34.8631	26.3107	44.5597	39.4005	24.6086	46.1594	39.7476	57.266	65.985	0.319063	0.407222	5.81857
	111017146	40.3112	74.3124	13.5883	35.6697	23.2974	59.4776	35.5921	71.0011	53.6533	0.460956	0.440554	5.81742
	111017311	29.6386	20.3671	50.3073	61.1348	41.5876	56.0108	28.2799	40.8207	53.1696	0.330179	0.345337	5.81304
	111016334	34.8548	33.6819	50.2322	37.598	37.1597	47.7097	54.8885	37.7247	32.4181	0.198931	0.290883	5.81208
	111017704	48.3432	28.3419	50.3064	34.0692	12.9946	36.7277	63.3418	50.6729	73.0023	0.413791	0.443857	5.81132
	111009744	38.1085	19.4412	59.1695	47.5701	20.5356	23.5253	46.2378	71.1205	78.2243	0.482739	0.479528	5.80919
	111022361	38.648	47.3208	46.3589	55.9811	25.7989	41.5809	45.7213	40.0264	25.5349	0.244021	0.305591	5.7955
	111011848	15.591	50.7876	52.2408	31.6694	73.1078	74.7396	31.2651	28.5338	35.6744	0.466877	0.466699	5.78853
	111018488	44.4791	31.103	15.3432	29.2979	23.6266	71.0672	47.632	57.2901	74.695	0.476008	0.464758	5.77764
	111018565	41.6776	44.3045	35.2675	40.0198	25.4663	52.7608	43.1876	27.5578	47.0645	0.223858	0.278475	5.76454
	111010622	35.7402	69.1679	5.3798	28.7412	47.0796	67.6795	54.8069	45.5284	61.5627	0.445078	0.373773	5.75697
	111021404	38.1047	17.7952	67.9641	38.9321	20.7734	36.7406	46.9594	59.3566	48.2056	0.391426	0.435607	5.75429
	111005142	42.1506	38.5871	58.1035	45.34	59.5683	38.8875	69.6824	22.2125	11.6663	0.425819	0.432218	5.75009
	111011481	12.9381	25.5136	46.8775	45.7704	29.2082	37.2203	65.9144	56.7318	62.1932	0.419029	0.399879	5.74994
	111008390	9.81442	32.8277	35.9212	44.8808	28.6724	56.3718	58.2583	57.2447	63.2261	0.409833	0.359459	5.7481
	111008711	37.266	35.0826	34.327	38.9259	28.045	31.6757	43.574	46.9856	55.3448	0.215476	0.331731	5.74703
	111008395	29.9632	18.2729	67.2775	33.3093	16.5445	44.9231	49.8106	69.6592	53.7029	0.457411	0.436894	5.74154
	111009919	26.5629	51.8395	13.7377	21.742	42.44	34.3058	51.9799	72.9381	74.7078	0.496872	0.472033	5.74124
	111018662	42.7538	45.2627	27.4272	31.7011	36.0138	34.8783	40.2286	36.6138	53.3357	0.199843	0.308907	5.73783
	111016927	22.482	17.6275	71.2437	33.0913	23.3571	46.7449	50.5464	64.5739	49.0782	0.453384	0.460477	5.73527
	111025673	23.5936	21.3286	69.5905	46.0857	22.6651	36.8138	60.9024	58.2965	33.6146	0.438037	0.455205	5.7326
	111014941	17.865	22.136	69.6211	46.4156	22.7836	36.0186	47.1342	50.0132	63.6156	0.441968	0.450631	5.72913
	111024385	22.4546	31.7913	33.2725	38.0105	23.9958	48.1046	56.5076	47.7722	53.5209	0.317739	0.338756	5.72215
	111015942	26.7117	22.2394	42.3882	29.852	16.9868	50.8048	55.6327	69.8488	59.0711	0.444741	0.456529	5.72038
	111004878	58.4996	44.2713	16.7144	28.4466	44.361	58.9594	44.1763	37.9798	27.4151	0.352138	0.360017	5.71955
	111010069	59.8607	21.4969	48.4979	23.6787	33.0389	52.8555	56.5092	35.9276	28.1523	0.366409	0.373218	5.71885
	111015938	46.5578	34.823	26.0658	31.6525	27.8534	45.5561	30.1265	42.0022	68.5884	0.340147	0.481258	5.71865
	111011160	44.9957	37.4281	48.9318	40.9241	30.2168	28.7628	34.7561	31.5687	44.8378	0.190859	0.250257	5.71522
	111016061	31.1926	17.8776	43.4061	68.5896	26.2493	34.8482	36.8871	42.4026	59.6224	0.395281	0.466964	5.71234
	111013482	34.5758	23.2025	53.031	46.0343	27.6968	34.8179	36.2618	39.4661	52.3904	0.266412	0.305959	5.71231
	111008904	42.596	30.6972	36.359	27.321	45.1743	29.02	28.8265	41.0091	68.1846	0.33131	0.484848	5.70731
	111024789	25.6247	65.984	29.4509	38.1687	37.9367	59.264	36.1503	34.4675	25.5914	0.363052	0.456963	5.70615
	111005022	26.5466	31.8805	22.3483	30.2713	23.6095	64.6765	48.0182	52.0161	61.2056	0.412888	0.428123	5.70305
	111011703	26.7922	29.6742	36.8566	34.2641	26.4647	31.5553	39.1807	66.0166	61.2666	0.372772	0.458367	5.70211
	111016935	16.0382	27.0659	61.3523	52.5334	24.2119	38.9257	30.3709	46.1288	70.8686	0.448392	0.476801	5.69973
	111023184	40.3504	30.4316	30.4961	28.7299	32.4838	50.1086	68.5016	39.256	27.4327	0.345004	0.490361	5.6976
	111016339	22.9307	37.3714	21.5692	46.3152	19.7576	39.8604	44.8975	60.1607	69.9416	0.430889	0.476594	5.69533
	111007712	22.2128	25.6039	25.8917	31.1898	22.8067	47.0484	56.4112	66.9799	65.3944	0.462021	0.446552	5.68812
	111018440	61.1004	23.5938	50.982	34.7566	25.4478	32.1151	43.7741	39.6742	33.3189	0.315645	0.41968	5.68684
	111011132	54.669	25.6594	72.0472	64.3978	18.5729	22.1128	24.7483	36.8732	49.2549	0.484275	0.485948	5.68597
	111020658	26.1529	33.9963	45.2941	59.2231	19.5204	57.0861	42.0939	37.5307	28.5351	0.348684	0.387466	5.68552
	111022022	9.98052	29.9627	44.1466	66.5979	50.9316	22.5639	33.2349	59.6866	57.9993	0.455402	0.420953	5.68069
	111015112	41.3773	44.0254	38.8588	32.1006	39.14	32.4584	30.186	35.2696	37.1752	0.125493	0.186362	5.67791
	111025773	31.6269	17.1931	51.6605	39.4749	17.0488	45.5865	51.9609	45.1776	55.2552	0.367869	0.321943	5.67441
	111018762	34.8105	16.0263	44.9277	49.6413	19.546	42.566	51.6875	40.8289	50.3263	0.33707	0.277695	5.67175
	111020713	18.7174	27.8013	71.1302	38.3659	24.5797	22.9466	45.0187	56.1583	54.2896	0.451286	0.494101	5.67173
	111008190	26.5787	30.1369	29.619	31.0695	25.61	50.5179	50.899	40.7449	55.1188	0.308346	0.35327	5.67038
	111015292	50.2574	43.6755	23.6314	30.6027	31.3365	59.9245	50.2271	38.2032	18.8262	0.353509	0.401831	5.66841
	111009029	44.7906	27.9937	50.4566	36.3405	29.8168	39.5129	57.7873	38.5469	17.7736	0.317876	0.383014	5.66775
	111023317	19.7185	41.4046	64.3223	50.9969	32.047	53.9484	42.7943	23.1256	23.0803	0.400263	0.442037	5.66553
	111007193	31.5039	15.4133	59.2978	16.9871	49.216	41.2423	25.3472	61.8385	67.8798	0.48246	0.445994	5.66533
	111013079	34.4227	31.3269	26.525	25.5057	23.9534	67.1563	62.0986	42.0703	34.2242	0.409859	0.478592	5.66427
	111006230	50.1726	16.3506	61.455	37.1614	31.5508	34.2195	31.6709	44.4324	36.2042	0.33531	0.426893	5.66137
	111005801	51.3743	29.9771	62.3831	61.7138	34.11	20.7041	31.1208	20.3667	38.7745	0.412533	0.422637	5.66114
	111021687	42.5252	18.9268	48.9859	28.6635	29.2031	32.742	53.3806	40.8278	42.8335	0.292123	0.333307	5.65795
	111021414	27.9263	33.6133	37.7145	32.3413	23.7271	50.5644	48.2101	41.6668	36.4814	0.239206	0.303658	5.65761
	111005680	15.0104	31.4602	21.528	24.9767	61.6847	60.5892	55.461	53.3367	35.554	0.450771	0.396293	5.65624
	111015458	14.7383	17.8313	57.2797	57.0288	22.846	45.1519	38.7394	43.4098	66.0373	0.457852	0.43777	5.65387
	111025964	19.657	21.414	62.8856	53.3325	17.2751	56.7641	51.6218	42.3673	32.2681	0.441176	0.414215	5.65282
	111013849	40.8793	60.6618	14.0248	52.0211	43.675	59.9504	31.6362	28.3914	22.8629	0.416951	0.395333	5.65213
	111026078	44.6994	38.0074	20.8089	29.6596	24.0448	57.5861	55.0003	44.8044	26.6555	0.355329	0.384226	5.64895
	111010202	29.4045	16.0909	63.0673	54.152	14.2363	55.5687	55.6152	39.0193	34.2387	0.448975	0.408716	5.64829
	111024780	41.0637	14.2478	59.9656	36.4522	23.5356	47.9312	55.1189	35.7942	32.5298	0.377561	0.402421	5.64421
	111021521	28.6666	37.2846	47.1496	48.4323	31.9875	25.8783	31.327	42.011	34.1166	0.220597	0.281417	5.64093
	111024515	38.7575	64.8232	8.19367	33.3407	35.0681	61.4608	48.3173	35.4745	35.6152	0.419653	0.428777	5.6402
	111018286	28.6041	38.5875	24.8726	27.9495	29.56	29.7435	48.3426	56.7223	48.7808	0.311892	0.390803	5.64009
	111023078	29.5986	40.2545	28.9527	23.3321	33.4702	59.675	48.8858	31.1653	36.2413	0.306372	0.430455	5.63745
	111019394	49.8955	59.7818	2.83287	35.5438	44.6485	51.6222	43.8244	52.6321	55.165	0.386063	0.297101	5.63621
	111010570	45.7424	58.7582	32.1956	30.5364	21.4553	57.7427	37.9013	29.1009	24.0822	0.366883	0.406983	5.63414
	111008217	57.585	38.7366	55.9034	49.559	47.7709	20.8577	31.4328	20.5857	21.6309	0.396863	0.378143	5.63272
	111011404	16.9035	43.9368	43.4572	57.9642	20.3772	23.9467	44.1683	30.4618	69.3633	0.452642	0.493219	5.63087
	111020139	43.0248	28.2216	15.3322	26.9533	28.073	60.3495	66.5064	56.9937	26.2022	0.466414	0.464055	5.62942
	111021370	54.8154	24.9736	49.3287	38.9972	26.155	32.0834	34.182	31.8762	34.3942	0.274793	0.379758	5.62632
	111007897	21.5528	50.7153	33.7075	43.2639	34.5798	23.7973	31.2463	37.3541	53.8022	0.300529	0.358258	5.62547
	111023980	43.0885	40.2577	12.2083	30.2945	37.2312	44.6046	42.939	41.4832	43.3134	0.278157	0.185016	5.62513
	111012421	26.9146	23.5864	51.6642	35.5243	7.84114	65.5743	44.9337	48.6993	62.0858	0.464513	0.425748	5.62354
	111013381	32.8118	36.189	48.9007	41.253	20.7801	22.3923	42.97	39.1183	43.2337	0.262426	0.287463	5.62277
	111023751	37.269	26.0769	18.1249	31.239	19.1885	67.5892	65.8665	42.4383	37.641	0.470411	0.486153	5.61063
	111020409	35.2497	23.7065	40.5871	31.2048	29.7008	29.6527	27.2668	61.6044	47.7175	0.329445	0.46212	5.60982
	111006233	35.4093	32.1138	34.5572	62.3297	31.121	28.1522	23.9658	28.6168	50.583	0.338262	0.469516	5.60924
	111015499	33.271	52.9605	67.5386	41.9999	35.9101	11.2449	24.6133	39.9107	37.2603	0.416671	0.487014	5.60801
	111010209	20.1828	17.8957	63.6105	40.9727	22.1414	25.3162	37.1831	67.9758	54.4744	0.495199	0.481844	5.60534
	111016366	30.427	40.9567	17.0871	20.9624	29.501	38.7625	42.9703	52.9977	61.4536	0.386974	0.443351	5.60263
	111004951	42.0397	22.743	20.9451	18.4561	18.5637	60.2778	68.5824	46.747	53.7935	0.498679	0.483166	5.60238
	111011717	19.8962	28.9362	52.0563	26.4926	19.9427	36.8869	45.1299	43.6095	57.6399	0.375352	0.40807	5.59057
	111010885	41.1981	46.6694	15.5959	41.7865	35.4258	38.8096	37.7889	29.5278	34.1901	0.252002	0.26525	5.58927
	111022708	49.3824	26.5725	47.3401	36.0392	25.7934	27.6246	42.9501	26.0816	36.5953	0.267133	0.319098	5.58846
	111005204	23.2231	29.4049	43.6669	56.5542	22.6144	38.5437	21.4255	44.4812	45.7273	0.345792	0.405245	5.58516
	111006575	26.9176	19.9243	43.0099	35.9838	12.0659	42.2336	52.8923	59.5956	47.0743	0.412485	0.412495	5.58188
	111021501	29.6728	53.5059	35.5586	35.9233	34.5322	24.779	29.4799	33.7259	34.9042	0.229773	0.395917	5.57526
	111018830	36.112	29.5087	51.0259	34.838	32.2849	24.8104	30.2735	31.3365	41.2805	0.222246	0.36198	5.57311
	111012646	32.5508	44.5927	20.8562	28.3856	35.7249	48.9937	36.072	39.7038	27.3767	0.252018	0.323223	5.5719
	111009904	22.4419	38.4632	36.5354	32.1715	35.3038	17.8392	36.2975	39.4714	64.2947	0.361857	0.497385	5.57159
	111005449	52.7545	9.84697	44.9996	33.0237	22.1016	41.9253	52.8216	52.8053	29.3056	0.404772	0.32139	5.57053
	111019793	16.2957	18.3771	46.0019	30.1015	15.9193	41.8482	57.0912	57.8851	63.6919	0.493675	0.443571	5.56964
	111020895	33.3624	59.6128	27.4507	52.6242	38.0206	28.5583	24.3036	24.5642	30.6449	0.354908	0.455803	5.56664
	111018579	24.6033	36.4026	63.5629	36.6982	29.4406	14.4153	27.0483	46.5239	50.3006	0.409403	0.478012	5.56396
	111011754	35.3151	19.0154	32.4477	18.255	16.1718	65.2915	56.5232	42.4615	53.4564	0.479666	0.476107	5.55744
	111007330	29.1656	33.0061	15.4701	20.614	22.6033	43.9068	45.0034	60.2422	64.957	0.470169	0.480403	5.55674
	111008648	37.5085	36.0223	39.7636	36.7464	29.7015	46.6015	49.8229	22.5495	16.5613	0.304534	0.334005	5.54812
	111007622	27.1967	44.598	19.9708	26.7987	32.9057	43.2116	43.6318	34.9077	35.8727	0.24992	0.258667	5.54682
	111019652	40.6026	43.7643	16.6702	35.5415	33.7073	30.3078	22.7899	34.2731	58.6911	0.345352	0.451244	5.5432
	111021328	41.1142	35.2735	25.8201	21.556	24.9677	27.3087	27.8889	52.5852	58.7703	0.37588	0.454414	5.537
	111016093	38.6579	18.8033	29.8904	29.2926	31.2494	40.6254	31.9961	41.5184	43.3282	0.23082	0.244045	5.53383
	111025157	58.8991	33.4212	22.3155	42.2913	24.2842	37.5835	45.1971	37.7868	15.7773	0.373548	0.45106	5.53098
	111023295	24.072	27.6755	50.6023	36.7903	47.4432	35.3485	29.7773	29.4423	24.6407	0.281286	0.36962	5.52831
	111013618	41.0512	36.5435	32.0517	42.9337	42.3985	34.8944	29.3872	18.3027	27.1984	0.239209	0.237698	5.5274
	111020991	39.317	20.5336	53.041	32.4022	12.5439	27.3431	27.5127	53.1171	63.7812	0.464214	0.479057	5.52625
	111024372	30.7544	14.3038	44.2582	48.3235	15.151	33.8329	52.8123	27.8402	62.0439	0.45135	0.461518	5.52493
	111019618	38.1264	27.3502	43.4271	47.6852	35.0922	30.8434	34.0799	25.2893	21.6487	0.251659	0.329306	5.52352
	111023111	14.0309	41.5719	28.7545	46.8434	39.1823	30.7117	24.1749	30.3895	61.462	0.393278	0.480047	5.5201
	111021899	26.2584	25.2883	44.8623	34.066	21.9927	21.4461	43.0208	51.6249	39.1013	0.322667	0.380058	5.51583
	111015087	14.2131	24.0217	27.4023	21.9246	46.2436	46.0043	49.5495	41.607	46.0788	0.376389	0.325181	5.51539
	111007521	42.4069	36.8794	30.0974	50.4113	29.7316	64.7322	43.2122	29.3995	7.08499	0.433487	0.480121	5.51404
	111011769	27.073	21.988	49.7144	34.7059	31.0525	23.6943	27.5238	44.8248	43.8776	0.297641	0.359492	5.51327
	111006031	15.8893	49.8371	46.3127	28.3688	54.7549	30.1521	23.3932	21.6877	46.6533	0.403743	0.401208	5.51228
	111005785	26.9235	34.0525	23.8228	21.3998	14.7461	36.2434	49.7018	60.4472	54.0049	0.443746	0.46049	5.51178
	111026044	20.9786	21.4484	53.0599	33.9276	11.0921	56.2946	37.0969	38.3891	55.7454	0.450823	0.396616	5.51028
	111018382	33.1563	30.8104	37.9328	36.3965	29.6261	22.9893	28.9875	39.069	36.8354	0.159469	0.178587	5.50996
	111020248	40.1038	29.265	31.042	29.133	21.0837	44.7768	30.0157	35.2134	36.8385	0.211894	0.29457	5.50567
	111012382	14.0148	21.095	35.8725	30.6835	29.4183	57.5422	45.2568	34.296	44.4052	0.378967	0.445967	5.5013
	111007681	26.2924	17.9402	25.5923	28.9496	33.937	49.8308	40.7438	35.0251	44.4717	0.300784	0.365472	5.49935
	111024130	28.8809	33.9761	15.2735	24.6271	31.164	36.3406	40.9126	41.6401	52.244	0.315891	0.395111	5.49805
	111022739	45.2513	16.4607	20.5965	22.4125	17.4938	56.5781	60.3762	42.2699	42.736	0.474215	0.453844	5.49768
	111016020	36.1017	32.5503	56.9431	39.2557	30.1882	21.9128	22.9274	25.7197	36.048	0.318985	0.462833	5.4969
	111026139	34.3937	45.1598	17.8343	33.0163	27.5976	43.1576	31.3016	37.9295	28.3561	0.252181	0.298085	5.49575
	111023067	29.2497	24.8659	51.4058	30.6019	25.2622	35.6163	38.4526	38.1438	22.9703	0.273174	0.403855	5.48681
	111013243	32.9091	31.4604	30.6242	30.9411	28.3149	23.4126	37.7629	38.7357	35.8017	0.14888	0.189292	5.48389
	111005738	36.4163	19.7986	50.0908	35.2075	23.6551	45.0471	29.486	26.398	31.647	0.297142	0.381984	5.48065
	111009433	15.5086	60.5771	13.9936	30.7836	38.6195	45.3088	28.8598	34.1993	47.1247	0.428352	0.475054	5.47852
	111024706	28.7405	21.2484	40.2275	28.9179	28.6572	20.1413	31.0378	49.7076	50.7952	0.337397	0.388037	5.47457
	111018171	18.1361	28.5942	58.4387	47.1421	18.1436	26.7239	42.8195	32.5193	33.1817	0.394419	0.471112	5.47393
	111006540	41.5917	24.1488	12.157	22.0369	24.0586	48.1612	61.1357	44.6188	37.1539	0.443024	0.480813	5.47187
	111011058	40.5112	24.8906	26.1192	12.7614	20.7444	34.4956	43.597	51.0016	58.6357	0.431349	0.458263	5.47065
	111014520	13.9983	28.8266	30.3662	49.9986	28.0916	60.1299	36.0177	26.3873	31.7551	0.400702	0.489768	5.47001
	111022018	21.3735	38.3171	17.5091	35.6814	33.0456	30.305	38.5624	37.2598	42.2322	0.253893	0.253965	5.46929
	111007756	27.9832	12.9805	31.5029	39.9837	22.1959	41.3319	38.3702	33.606	53.992	0.354289	0.425947	5.45935
	111021749	32.8799	22.08	26.7907	27.8736	28.0674	36.442	27.4774	35.4069	52.5553	0.276432	0.436265	5.4545
	111015731	45.7911	45.0496	22.0598	32.9533	27.4421	34.711	36.7231	12.8597	41.8589	0.329173	0.30757	5.45384
	111025421	25.3141	20.8098	45.7996	27.9639	12.4149	33.3598	31.2355	59.9279	52.7685	0.450606	0.479236	5.45019
	111007355	20.5819	41.3344	47.9934	32.2695	42.2918	31.7524	19.7437	25.2529	31.0436	0.302893	0.363792	5.44894
	111005148	41.0832	32.6792	28.6205	31.5859	33.3532	37.5294	24.0955	25.9314	28.5538	0.172405	0.262627	5.44728
	111008399	40.7281	26.9591	32.2206	30.9489	24.3379	30.6774	23.1637	31.8167	44.6061	0.222802	0.325058	5.44592
	111017731	41.9944	11.8841	57.2895	22.7601	27.6121	49.993	55.219	22.9063	23.4487	0.476384	0.441831	5.44453
	111024848	27.9013	45.2293	11.4958	28.0721	35.9514	35.3617	32.6346	39.4445	38.104	0.294899	0.311936	5.43684
	111010422	30.4534	32.2408	14.4119	17.9489	20.0661	55.727	60.8548	49.0261	29.8327	0.489796	0.487085	5.4361
	111010128	17.7797	17.8802	43.9502	27.4334	17.1645	34.4421	53.4595	54.1232	37.6779	0.437415	0.423104	5.43241
	111020732	55.5573	33.9882	21.9145	21.7242	19.0359	45.812	30.501	33.0385	31.0178	0.365091	0.466695	5.43112
	111014316	39.5886	14.555	29.9729	17.8366	57.7589	42.9378	43.2504	22.3952	32.9783	0.415815	0.472993	5.43046
	111020887	19.4892	24.5567	29.2592	25.0183	50.797	28.1123	27.1584	30.5243	57.406	0.393321	0.488478	5.4265
	111018573	10.5311	31.6512	57.879	44.1101	25.1465	17.5773	29.0833	41.5184	52.1026	0.457766	0.456365	5.42553
	111020929	25.0198	21.0159	39.4615	42.8867	17.1152	33.8173	38.6651	25.7781	44.9257	0.315359	0.321771	5.4214
	111014709	23.8238	31.3635	28.6544	26.4339	25.1928	48.505	35.0168	23.816	39.9588	0.267379	0.3963	5.42129
	111020860	26.0454	57.2841	33.934	40.5157	40.457	19.4476	17.5084	24.9558	32.3978	0.382638	0.486633	5.41989
	111007880	29.2303	19.2826	17.8704	22.0253	21.1722	46.2883	48.2075	39.9133	54.0074	0.425573	0.435286	5.4181
	111022537	53.5811	33.9034	16.6393	22.0015	20.9283	37.0106	46.5758	30.0038	30.4274	0.374065	0.445956	5.41313
	111013305	25.5298	34.7682	7.53074	19.2926	23.2661	49.8963	57.332	50.0979	49.3464	0.489873	0.433719	5.40804
	111009157	23.041	30.8521	18.4171	24.177	26.621	45.2612	32.8065	35.3573	47.4567	0.31315	0.376977	5.40633
	111005964	21.8154	25.5002	28.0278	14.0861	15.8982	49.9352	46.0344	47.1061	55.0713	0.468258	0.436178	5.40502
	111008165	11.5537	25.8761	39.5404	25.1655	38.9862	40.2689	28.4583	28.1762	55.1048	0.381383	0.460062	5.40358
	111009197	38.3777	30.9776	52.7862	37.3164	32.3788	25.2119	29.2025	15.6657	22.8907	0.336056	0.450564	5.39871
	111014790	35.5951	21.9572	52.7562	37.1354	26.4852	16.3711	28.0475	27.462	38.9773	0.340627	0.450229	5.39801
	111025537	23.7609	29.3965	22.0567	24.0072	21.7946	29.9064	39.2545	37.8302	55.0136	0.348247	0.48193	5.39609
	111005606	13.4244	28.7004	52.2384	28.2897	55.2862	28.8167	34.7269	28.7639	21.3468	0.417197	0.465718	5.3932
	111007240	35.2161	24.2475	28.8049	25.9927	24.7099	43.3738	34.3921	31.7126	25.2725	0.210427	0.336153	5.38938
	111010756	20.3431	22.4068	46.0311	24.4585	29.7303	36.3356	32.5518	27.542	36.8898	0.26625	0.374722	5.38463
	111020350	33.997	50.4767	13.4932	29.4996	30.9844	25.9321	30.884	35.8856	30.0699	0.309237	0.428583	5.38424
	111021173	24.6298	23.8868	31.2246	25.4219	21.1064	29.0736	34.3733	41.6464	44.1975	0.263704	0.345657	5.38284
	111007092	27.2321	20.9511	36.313	30.7028	14.4625	30.534	43.5977	40.1422	34.962	0.296458	0.325367	5.37427
	111024207	45.5429	28.078	59.8503	45.7523	35.0118	27.7845	41.8454	11.6669	9.85498	0.483983	0.487186	5.36664
	111022952	50.0979	30.4528	29.5461	31.4656	19.855	28.5812	24.1685	28.1326	29.7853	0.273887	0.446117	5.36577
	111020180	20.4719	15.0285	28.0155	27.1262	18.6806	36.3346	56.3416	47.5862	37.1341	0.432445	0.488882	5.36077
	111023503	24.3352	47.6463	38.9905	43.017	39.8842	26.1369	19.6291	23.4366	16.87	0.362732	0.390562	5.3601
	111021226	33.4048	29.7229	25.3352	24.7568	24.482	30.5341	39.5471	32.9992	24.9978	0.175482	0.284927	5.35443
	111023970	38.7522	43.753	16.4061	30.7593	23.3937	26.9243	33.9843	21.8154	37.7667	0.295644	0.343468	5.3534
	111010822	16.5116	30.9465	27.2533	24.2982	24.588	43.3332	49.603	32.1827	25.8718	0.334595	0.433036	5.35126
	111012565	34.949	20.6801	44.8996	28.0248	27.394	28.3078	43.1008	22.9346	20.5446	0.301324	0.370997	5.34503
	111015039	12.6985	54.7724	30.4456	36.4164	33.5006	44.5983	13.4072	27.5593	33.3766	0.421224	0.470531	5.34376
	111005424	13.9274	25.9345	16.8776	20.4827	27.4854	50.7206	54.5009	43.9432	33.3329	0.462972	0.466283	5.34019
	111021447	35.6815	26.8666	11.6418	21.9646	27.2562	39.3626	43.8644	50.3737	23.3411	0.389654	0.429318	5.33631
	111021743	24.5418	21.5244	29.6467	23.1103	16.4769	27.5771	46.827	36.2868	47.8365	0.363246	0.40947	5.33397
	111005668	23.533	16.1619	47.6814	41.7574	15.932	29.1871	32.823	29.5205	37.2151	0.35656	0.407186	5.32574
	111018002	19.2967	21.0185	28.6967	37.8457	5.73282	56.8081	40.4376	50.6686	42.7489	0.485609	0.457724	5.32405
	111017590	34.1776	42.1785	5.41297	19.9877	26.2062	45.7588	38.9233	32.5357	52.7242	0.433766	0.418718	5.32306
	111006306	9.83204	25.7699	48.342	42.6097	26.3193	36.2612	28.1062	23.0669	38.5218	0.376498	0.40402	5.32244
	111007968	33.2052	26.3136	25.8588	28.0305	19.8604	40.338	47.9688	20.93	24.2351	0.313755	0.429912	5.32122
	111004798	6.95268	26.6104	50.3622	45.552	45.7493	18.6927	25.9409	41.6219	31.4582	0.443924	0.397916	5.321
	111006523	26.4779	13.5288	30.9335	25.3485	14.6191	40.2263	44.1323	35.7677	46.5698	0.388449	0.379872	5.31857
	111004940	41.6412	22.5696	41.6691	25.0793	15.2755	33.2609	33.5134	28.0833	25.4444	0.295816	0.325437	5.316
	111022653	33.4654	25.6727	38.5992	27.7473	23.3703	15.9302	31.1176	27.6518	40.4466	0.259506	0.309107	5.31563
	111017070	22.047	23.1736	42.7394	28.5699	24.6986	26.391	19.9476	31.839	46.0836	0.311658	0.404869	5.31535
	111026088	36.3782	34.9104	56.1325	45.1641	32.2273	44.9951	41.4378	12.7821	4.80309	0.472393	0.437273	5.31502
	111020094	47.0626	27.5149	19.5389	24.6504	19.5851	24.1238	34.5449	26.5798	43.6796	0.336099	0.415095	5.31423
	111015169	37.1908	50.6868	8.84713	27.8416	18.4534	39.5156	26.75	31.7175	40.8326	0.402495	0.429959	5.31303
	111016983	26.5472	23.8708	16.4038	18.324	13.4599	53.9092	40.7778	40.4028	51.4434	0.483169	0.463845	5.31281
	111010085	16.9589	34.8265	33.06	28.9776	20.6063	21.8702	31.0888	34.3571	42.7591	0.27896	0.35176	5.31187
	111024163	37.8842	31.6709	12.8638	21.18	30.1365	26.1763	26.6802	33.6448	49.918	0.347824	0.448504	5.31062
	111022219	47.9356	54.8518	4.4984	27.1483	34.96	32.5507	27.2095	23.4277	48.148	0.461728	0.439677	5.30583
	111006502	17.7871	40.4806	23.7875	20.9558	30.6294	42.7372	32.8842	25.9009	27.6847	0.288216	0.356211	5.30387
	111021621	30.4149	20.5358	46.3758	36.2229	52.5139	19.622	13.7596	18.1021	40.9075	0.446623	0.462188	5.30296
	111004912	24.4641	30.7996	12.6618	15.0554	38.634	37.8933	30.715	32.9052	50.7656	0.390627	0.450592	5.29962
	111016653	33.298	43.2433	12.692	24.9018	42.373	29.0162	24.3669	27.039	29.1861	0.317565	0.355758	5.29918
	111005550	45.743	24.7553	17.3777	26.2941	17.5314	32.2029	47.6593	25.2103	30.0771	0.366058	0.425107	5.29613
	111007243	27.6939	35.5453	10.7405	28.941	28.4155	28.6339	27.2086	28.4006	52.8279	0.36418	0.489902	5.29004
	111018240	30.1089	19.2687	30.943	24.7217	18.6633	33.8092	27.8103	38.9705	33.4188	0.236577	0.298367	5.28972
	111011797	14.1898	17.5428	51.6729	44.4321	18.365	35.1516	36.9828	30.9927	23.5488	0.426138	0.464891	5.28678
	111013446	25.5674	28.7245	34.3845	34.267	24.202	25.8149	22.5285	29.4217	26.9056	0.148888	0.209559	5.28159
	111016074	52.9161	24.343	14.2483	20.1431	22.2899	34.0964	30.4965	31.8753	35.0481	0.380117	0.49793	5.28045
	111023861	18.9037	20.1258	40.1709	28.8227	15.1964	23.7654	45.4405	43.2674	30.4889	0.377368	0.392774	5.27984
	111020373	26.2836	28.7003	36.3763	30.7484	28.5418	20.4409	22.6622	27.5313	30.3736	0.166267	0.260225	5.27631
	111018542	16.4146	31.1178	29.8642	26.4886	26.198	21.8037	28.18	28.0492	51.1224	0.329401	0.491133	5.27627
	111019139	33.3183	28.5327	27.7096	27.6102	35.898	33.1021	31.0012	23.4308	14.6808	0.224119	0.23608	5.27437
	111025553	45.4198	36.8899	4.33882	30.2372	34.7702	52.1244	25.164	27.7478	32.2678	0.419275	0.432043	5.27013
	111016395	37.8366	42.7972	14.4113	24.2401	34.0538	34.9067	30.6191	29.9277	14.2363	0.339023	0.356759	5.26645
	111007697	28.3817	28.7236	18.9493	26.7492	17.4685	39.9736	32.8599	33.6526	27.4686	0.248356	0.330016	5.26631
	111021575	29.2709	22.52	33.9012	33.6767	19.1492	28.6537	30.9128	26.8287	25.1776	0.177615	0.202869	5.26369
	111005583	26.2635	13.1935	28.3977	19.8737	20.4256	29.7635	51.9792	41.6289	33.2298	0.402029	0.488315	5.26231
	111024809	29.7329	34.7978	12.2984	20.2368	26.6675	48.8496	27.2984	29.6979	31.2484	0.344575	0.457575	5.26136
	111012583	17.8761	29.071	32.8372	25.2012	17.9227	16.8804	31.7856	39.955	51.2977	0.391758	0.484555	5.26095
	111018165	14.1652	23.6019	48.2949	28.6028	21.9984	17.1541	27.1532	34.0441	52.1951	0.44134	0.48507	5.25967
	111020313	14.7083	20.0356	35.5701	17.9813	12.6154	33.1607	48.465	46.9558	45.5544	0.475364	0.415605	5.25513
	111017259	44.2497	30.2456	23.4871	27.1881	24.9499	24.8085	35.7988	25.7153	16.7422	0.281651	0.409783	5.25472
	111022555	29.2138	38.1686	8.24781	15.8516	24.0212	34.7533	29.4848	50.9936	44.4412	0.439652	0.450464	5.2543
	111015997	15.3664	16.4264	48.5523	24.6826	25.0021	22.5364	23.305	47.7371	42.8623	0.442795	0.43896	5.25421
	111008841	16.9266	15.6244	50.5265	45.7838	14.2779	27.0987	39.4698	25.7079	33.5098	0.446488	0.459692	5.25265
	111016404	20.0785	22.741	25.6009	27.6835	21.7125	37.6784	42.5748	30.4193	23.3439	0.273757	0.385616	5.25175
	111004619	17.0842	26.7855	28.8394	24.1313	20.5503	20.5661	27.331	49.5817	43.401	0.378958	0.473876	5.24999
	111023240	17.9601	36.7561	44.3987	34.5672	34.6886	11.6972	20.238	21.9577	43.1767	0.398854	0.37768	5.24941
	111021191	32.9364	28.9294	23.3227	21.7898	13.4876	25.8116	34.9177	26.937	48.332	0.342318	0.461712	5.24479
	111015206	26.184	33.6915	20.9901	25.0823	28.7564	22.3493	39.8233	32.5945	19.0792	0.244586	0.344833	5.23901
	111019279	27.2633	21.2914	29.18	25.0622	31.5401	23.5087	40.979	21.0483	26.862	0.224586	0.372374	5.23684
	111011716	21.4516	15.6618	41.4436	25.8315	25.0509	26.0518	20.6379	30.0358	50.021	0.379664	0.484804	5.23652
	111009006	40.0043	23.6913	18.2194	24.1106	17.3517	50.2665	35.9998	33.8647	16.3565	0.407904	0.478782	5.2357
	111007362	27.3027	21.3726	16.8884	20.6444	15.1427	46.9496	35.6272	33.1434	41.7188	0.391551	0.43599	5.23312
	111023988	43.2322	41.0868	9.89273	24.0797	41.8297	25.699	34.3736	32.3368	13.9242	0.40977	0.354582	5.23119
	111020705	50.7219	42.3883	15.2254	35.3314	24.4395	20.5922	32.0169	24.2685	15.4864	0.420793	0.483092	5.23036
	111006699	26.0142	21.5399	47.9155	29.819	24.4754	16.6777	30.7551	31.6373	22.0099	0.321607	0.470608	5.23024
	111021065	24.214	38.6794	11.9031	20.7516	28.342	26.6046	37.2352	26.5533	40.5517	0.327071	0.339474	5.23014
	111008209	25.6968	26.7305	22.7083	27.2766	26.396	19.6746	25.3462	31.3433	39.687	0.208112	0.35378	5.2295
	111023160	38.963	28.4017	34.8203	27.5564	20.3424	19.7233	25.0648	33.0456	19.3437	0.257607	0.331742	5.22623
	111019013	29.1473	28.2253	38.4754	33.8596	36.7366	12.6873	15.0036	21.5137	41.9242	0.361787	0.357028	5.22468
	111023867	50.8492	37.2137	18.39	19.2656	38.0224	20.3019	19.8932	23.6352	27.7329	0.397849	0.497399	5.2244
	111008041	24.0877	32.7244	27.5145	35.2449	21.8926	26.2263	11.8089	32.8958	38.7436	0.292312	0.314742	5.22098
	111011801	43.0353	18.932	28.0622	19.0053	15.2386	19.0109	30.3082	36.0276	47.5743	0.407104	0.449229	5.21936
	111020290	17.6912	20.1316	49.889	37.6358	17.2927	31.9871	37.2359	22.8865	20.6392	0.400846	0.485107	5.21854
	111006739	22.7734	40.5724	22.7291	35.1129	37.2785	43.4653	48.0952	21.7378	5.20783	0.442305	0.405145	5.21853
	111017277	22.4161	23.0308	33.4838	25.2414	18.8084	29.9472	34.8577	26.8986	28.0503	0.194673	0.254553	5.2175
	111022020	28.5412	18.635	29.5761	29.6954	17.6541	27.1895	27.1056	26.7557	39.5716	0.236706	0.351958	5.21678
	111006841	26.4246	41.7727	18.0044	27.8185	31.0171	25.6953	22.2015	19.7592	32.7222	0.267466	0.390623	5.21402
	111020254	12.7861	29.4601	35.024	50.5655	41.9139	14.2749	16.1493	20.8978	46.2143	0.486611	0.464259	5.21147
	111014811	27.3824	37.3122	12.1258	22.5669	19.0351	25.7076	31.012	31.7424	45.5526	0.353252	0.432292	5.20913
	111013961	34.775	19.5687	19.3264	26.8557	31.4735	40.3179	40.4406	25.5625	13.0873	0.344387	0.34791	5.20725
	111014422	18.5084	20.4128	33.8796	19.4597	18.1173	30.8641	24.6018	37.2626	47.2253	0.365689	0.4624	5.20636
	111014044	23.1652	27.731	20.7758	31.9993	25.447	37.8126	46.5274	17.5699	17.9215	0.349345	0.456174	5.20611
	111013147	27.456	47.0685	6.87343	39.0283	26.097	38.438	30.2712	24.9419	22.8234	0.39619	0.426557	5.20536
	111023738	27.0589	20.8056	41.1786	22.5809	17.4641	31.1678	33.3947	27.1149	23.1839	0.268142	0.384478	5.20507
	111015528	49.1433	17.6441	38.4659	24.0978	15.5726	32.9633	51.9528	20.9242	13.3097	0.494112	0.489631	5.20474
	111008473	22.903	30.9984	14.2707	23.7073	30.152	26.5141	39.3071	35.677	22.1613	0.279333	0.343682	5.2047
	111011725	21.4368	30.605	25.2929	20.9598	45.4451	18.7221	21.442	19.5541	47.2105	0.397456	0.461301	5.20171
	111006635	26.3115	28.7028	15.3099	16.9537	24.22	17.4797	38.0803	43.231	42.8721	0.39065	0.392999	5.2017
	111020394	7.12216	33.0178	24.1802	19.0114	27.0404	51.121	35.7895	22.0513	48.8896	0.473806	0.469146	5.19918
	111016110	18.613	37.7864	33.7944	46.208	41.7584	34.5152	17.2297	14.2862	14.5493	0.436651	0.425065	5.19647
	111008387	20.1219	10.851	22.8179	35.6235	32.5064	36.3791	25.5324	37.0566	28.2262	0.317761	0.284682	5.19465
	111009211	25.685	29.8343	30.6157	21.1489	18.3631	19.4216	21.1065	35.5453	41.4656	0.29436	0.391904	5.19176
	111009131	12.0796	30.9976	22.3939	24.6997	41.5136	30.1947	13.499	31.0826	48.143	0.417689	0.463939	5.18398
	111011816	17.1893	20.6331	27.6722	23.8569	21.7832	35.1212	30.6388	34.9566	27.0052	0.23641	0.274886	5.18204
	111025416	19.4488	15.492	32.2415	25.5907	15.7285	21.3019	38.6329	39.0509	41.127	0.374255	0.36937	5.18163
	111025434	31.909	29.8915	23.7563	29.4889	22.6378	23.0704	25.7286	22.2578	25.803	0.136504	0.206202	5.18128
	111017885	22.8049	23.7787	34.0429	31.9658	23.0676	15.5067	23.9965	29.0327	34.4677	0.237239	0.259466	5.17852
	111009067	37.9228	33.6787	17.6755	24.1367	32.8659	40.3551	16.8497	24.1073	17.1273	0.339156	0.366983	5.17723
	111007649	21.694	41.8629	10.5641	20.0695	25.6542	33.5234	32.5802	25.4097	36.3663	0.34717	0.385311	5.17587
	111023245	21.6617	22.0797	37.5742	20.7034	23.673	18.8048	22.9549	30.3423	43.0397	0.314521	0.425548	5.17522
	111025439	28.2289	34.0843	10.9915	23.8246	25.0731	48.3759	37.1787	26.0557	16.7147	0.398152	0.477654	5.17467
	111014201	28.1978	18.861	37.4997	31.6015	19.4441	34.0882	27.7876	23.2673	18.261	0.264791	0.328299	5.17414
	111016005	25.3944	38.1733	5.20239	19.419	25.3043	40.8419	30.2142	32.4284	49.2496	0.435784	0.44929	5.17257
	111008824	19.986	19.579	17.018	19.9842	17.7171	35.822	37.7907	41.9453	36.3748	0.375375	0.391256	5.17211
	111011832	23.0053	14.4452	48.0865	32.3019	18.3501	23.3306	32.6299	23.1196	28.8837	0.365096	0.490329	5.1703
	111021721	40.7471	22.4698	11.0023	18.2766	16.1378	41.07	25.5262	34.9614	44.1148	0.433759	0.40442	5.16993
	111014834	25.0381	14.2423	20.847	17.9963	11.7691	30.7508	40.9748	48.2513	49.4869	0.499028	0.469886	5.16768
	111013515	13.262	19.0217	50.2014	32.7733	30.0659	15.3222	18.5652	34.8607	38.1817	0.440277	0.496895	5.16726
	111007400	41.0392	12.3424	22.1856	18.4956	17.3845	34.1606	38.4894	39.0024	25.4603	0.389595	0.367918	5.16702
	111021772	27.2673	14.3043	50.1155	19.0897	13.4615	38.8941	49.1595	24.1392	20.032	0.497921	0.48532	5.1645
	111014038	36.7427	34.131	45.9709	28.099	24.4322	26.0028	34.0893	19.9869	6.47459	0.396421	0.429099	5.16086
	111024069	36.6288	24.9068	48.4169	31.9931	20.7966	13.1337	20.8474	18.9699	29.6203	0.393448	0.491664	5.16021
	111024564	38.7437	35.1536	11.2941	23.7776	24.4228	28.873	23.8764	25.9349	28.1761	0.291087	0.349867	5.15945
	111014820	34.9908	17.5553	30.6094	17.5546	16.1008	33.1622	38.7569	30.5317	21.4175	0.322038	0.348754	5.15825
	111020655	31.9977	19.8059	25.6616	17.4413	16.3343	41.4088	28.9208	26.6635	29.9705	0.299097	0.405936	5.15708
	111009763	33.9697	49.25	27.0776	39.2513	25.9897	17.5917	11.6295	11.6901	39.8386	0.464407	0.474523	5.15596
	111023905	34.8821	26.7491	37.9598	37.6024	32.3218	22.4444	21.4694	15.7171	13.1912	0.345486	0.326994	5.15218
	111025895	29.6249	20.6672	23.9789	17.1419	21.9603	24.536	23.3351	38.107	35.0769	0.26412	0.356019	5.14951
	111016518	34.4752	31.805	15.0665	22.6988	28.4421	33.078	23.558	20.8573	24.16	0.246059	0.276053	5.14793
	111015177	8.94335	14.1826	30.8431	33.345	19.6034	30.0607	30.9439	45.0541	39.0644	0.416316	0.425728	5.14788
	111012104	30.8918	38.8403	29.3023	26.6723	38.345	19.002	32.0747	15.9586	11.4725	0.35738	0.344369	5.14107
	111020718	31.2965	45.2535	5.31581	27.8715	31.7943	27.4142	29.5918	23.1936	31.7008	0.371819	0.424966	5.13974
	111013397	19.5755	21.0572	34.9298	30.6912	19.6836	20.5548	27.5755	23.2516	34.1225	0.242958	0.296761	5.13699
	111011744	19.9781	21.2689	10.7616	22.1359	23.6931	34.8938	34.0535	38.9416	35.1133	0.349659	0.35192	5.13637
	111005167	36.5683	25.4933	35.1423	30.1617	25.0248	14.8048	25.4553	21.6304	18.1651	0.280422	0.330439	5.1264
	111021032	21.2753	19.3395	38.1936	41.9235	14.9292	15.5345	24.8043	30.6288	31.4495	0.366443	0.415141	5.12592
	111013087	34.1265	33.5471	17.6321	25.7634	23.0791	17.696	19.0755	32.9906	26.7889	0.264157	0.279986	5.12282
	111014708	27.015	17.7414	36.0974	32.288	14.0345	18.904	29.4597	31.6664	25.2741	0.289896	0.319954	5.1189
	111005259	35.9565	25.936	11.8414	21.4613	32.8681	34.2298	36.318	27.3684	12.8928	0.355593	0.302845	5.11531
	111009281	14.3799	39.504	20.7672	20.1699	38.534	11.8054	18.4227	35.5872	47.7402	0.471887	0.478504	5.11395
	111025728	33.1831	25.4422	41.0716	30.6404	41.339	11.7064	18.3541	19.6739	18.2462	0.39726	0.40033	5.11393
	111019874	33.6999	14.3394	32.5787	22.7615	21.1628	26.4078	23.386	26.5299	26.577	0.232112	0.281367	5.10983
	111016495	41.8121	24.2395	5.82012	18.5457	22.9644	40.4203	19.7558	31.9564	51.3693	0.494384	0.49991	5.1094
	111010273	36.573	40.1022	3.75407	24.8608	37.9152	38.1283	28.191	23.523	24.8204	0.398882	0.321216	5.10763
	111004803	20.8962	24.7479	29.8322	18.2949	31.0616	27.444	26.2247	37.6864	13.5819	0.283208	0.362889	5.10627
	111012288	17.766	25.2387	18.7765	22.9576	19.3064	31.5699	41.849	35.7632	18.2936	0.339686	0.433463	5.10607
	111012403	34.7872	23.2222	5.79223	15.0063	19.2264	29.9609	42.6391	45.5951	40.9749	0.479297	0.419868	5.1059
	111019949	30.9663	22.7515	9.57054	19.031	16.5093	47.0976	39.196	30.8654	26.6199	0.430799	0.481105	5.10546
	111022756	18.7546	31.4301	15.3086	12.7581	31.4038	40.5568	31.2897	23.6895	28.9037	0.347742	0.403497	5.10184
	111015958	14.8683	20.2341	39.7522	15.5986	16.7234	26.5849	23.5446	40.5427	39.4345	0.410636	0.393415	5.10084
	111018125	30.9356	24.3078	35.9407	26.8989	22.244	28.7209	36.9182	17.3172	10.4629	0.329071	0.333568	5.10006
	111016593	14.5889	22.4534	34.2669	25.9321	17.7063	23.2079	24.3564	26.0503	40.2493	0.307984	0.414392	5.09735
	111009091	21.1224	12.1329	16.7143	21.5503	22.2919	40.6962	44.593	26.3395	30.76	0.408562	0.4629	5.09581
	111018259	20.7235	14.3995	41.1756	25.9449	14.8042	21.5868	30.048	31.9265	30.8663	0.340075	0.422292	5.09534
	111010803	9.74343	25.9167	43.759	27.9982	35.779	23.4378	14.4488	20.0924	38.9007	0.422575	0.43921	5.09066
	111014025	46.6753	23.5419	13.47	18.756	20.5723	37.8271	40.4191	21.8019	15.0151	0.454552	0.487407	5.0867
	111010221	28.461	22.9409	9.27969	15.6728	43.7752	35.3018	37.4257	20.2882	25.6192	0.413973	0.443209	5.08649
	111012507	33.9436	22.9604	40.8649	27.2024	22.9673	15.4136	22.2017	17.1276	24.2649	0.315593	0.430802	5.08509
	111019699	20.5953	31.9997	8.70774	20.5356	26.7962	24.4296	31.3593	28.9794	40.0903	0.342947	0.396978	5.084
	111017202	9.40452	36.7098	34.7523	22.146	32.8476	10.7495	23.8269	27.224	46.051	0.444456	0.463473	5.08354
	111004517	22.3172	23.4128	24.0899	23.3172	16.7474	23.8615	42.9311	32.5709	16.9708	0.322576	0.466332	5.08243
	111004691	21.219	16.8597	34.1269	21.0317	18.648	36.5569	26.3162	27.7404	21.505	0.27503	0.359057	5.08039
	111009133	30.8668	17.8481	10.5026	15.0704	16.2265	42.7247	27.8807	38.58	42.075	0.46316	0.417638	5.07968
	111005699	31.8057	28.7663	38.9577	28.5006	18.9593	13.5519	12.5229	27.8958	29.5447	0.342748	0.3854	5.0772
	111020649	27.9891	23.4411	33.2254	31.8479	28.6244	20.863	17.752	17.1347	20.6378	0.243878	0.291619	5.07168
	111016868	28.4282	16.6914	36.5167	29.0844	17.1903	19.1996	37.8378	23.4487	17.104	0.332208	0.38004	5.06677
	111019369	32.651	12.6567	16.9517	18.7823	23.5249	28.8918	36.2576	36.1438	21.1437	0.342493	0.342393	5.06381
	111006940	25.4849	24.0668	43.456	32.7366	24.3669	16.2031	22.706	17.0521	17.8122	0.347941	0.481002	5.05706
	111021171	32.9608	31.95	36.4234	40.1501	19.3574	36.5082	19.6121	11.0096	10.09	0.43601	0.383838	5.05674
	111024616	39.4461	14.9564	29.1744	21.5723	31.4457	24.9468	20.4254	16.5521	23.9935	0.310979	0.419883	5.05618
	111017840	20.3566	21.8601	35.9687	23.2783	19.5779	15.6264	24.9035	28.7057	28.694	0.249718	0.364022	5.0545
	111017441	32.945	39.5867	18.0417	23.5717	40.1443	15.0482	19.1627	20.8778	16.7968	0.391137	0.420745	5.04845
	111015033	12.9965	12.584	24.6081	17.2941	19.2288	31.6729	44.2297	34.8868	34.2493	0.430618	0.470038	5.04764
	111015526	22.1823	16.3407	19.1421	17.1131	12.3955	34.9291	33.6598	39.8632	32.0207	0.390707	0.411163	5.04538
	111023754	40.081	18.2536	16.7559	28.6912	18.7851	25.1838	14.512	21.7093	41.7954	0.397655	0.449785	5.04408
	111004897	15.5705	18.024	26.6037	26.7691	17.6795	16.5459	33.0956	34.2084	32.9949	0.315148	0.315653	5.04356
	111008352	15.7174	12.4495	36.2489	35.2539	12.8818	29.6979	25.4342	24.0981	36.6819	0.389085	0.346471	5.0411
	111026039	13.7821	22.1711	39.2096	30.8497	41.8741	21.7841	14.8921	23.2701	18.1634	0.402407	0.45037	5.03896
	111016080	16.077	19.8438	35.6058	23.5866	20.9697	13.2224	20.7417	32.8338	41.905	0.385313	0.454478	5.0388
	111011493	19.274	22.8224	22.1461	28.6369	28.1646	35.4476	21.1943	15.3265	22.8926	0.247219	0.363648	5.03506
	111006411	35.9434	19.2955	20.6949	19.9425	22.0801	34.3344	35.4958	16.1232	16.5465	0.338559	0.358322	5.03379
	111021502	18.8393	17.6031	21.9124	18.2121	13.5861	23.9634	34.3368	34.9143	39.7456	0.372484	0.423308	5.03365
	111004601	45.0286	15.6819	31.7023	32.3921	24.8219	28.7516	22.5845	18.1144	9.65313	0.414756	0.490041	5.03292
	111004954	21.5531	21.6552	16.7521	22.3197	19.7046	18.425	20.7724	38.3031	40.504	0.354885	0.446088	5.03278
	111017625	20.882	15.9569	16.74	21.1694	22.2664	34.2414	28.1112	28.448	27.6425	0.252773	0.338461	5.02867
	111018626	39.7237	9.92726	21.6005	13.89	25.1843	41.496	13.0238	27.1874	45.036	0.499439	0.467002	5.02717
	111010971	28.8719	14.5989	20.7537	16.2694	13.6676	29.5004	37.2715	31.8481	28.7817	0.34485	0.381929	5.02626
	111009239	25.423	29.1792	22.1635	21.5754	25.3572	33.3749	26.3429	15.9811	15.4415	0.243696	0.320359	5.02552
	111009650	22.766	14.7956	42.9894	28.6613	21.5534	27.2158	46.0353	14.5791	11.8705	0.474893	0.499213	5.02454
	111009251	32.5066	38.9868	6.03742	16.4201	21.946	25.7441	26.5664	27.9852	36.2565	0.393653	0.379719	5.02236
	111012657	32.7848	36.418	13.7	22.094	25.3634	24.2086	29.5103	19.0003	15.3318	0.316802	0.375333	5.02187
	111012874	31.2985	17.1646	20.5568	21.3158	12.0952	40.2181	40.0645	29.0372	14.0716	0.421567	0.423132	5.01908
	111021204	23.1962	26.0025	34.0058	24.4134	16.6304	19.8902	34.973	22.7279	14.2229	0.292237	0.352753	5.0189
	111024844	15.1175	13.8548	35.6412	22.7354	16.0923	13.2913	30.7655	39.2132	42.453	0.459391	0.450241	5.01775
	111020314	22.7616	21.791	18.3742	29.7957	20.2451	32.5817	32.2317	20.0446	16.0462	0.260073	0.30448	5.01756
	111013254	14.915	16.3917	28.3869	20.2095	16.0831	20.2091	24.4395	40.9729	39.0459	0.398421	0.451831	5.01099
	111020283	14.6639	38.014	9.23812	18.2665	26.6872	17.5869	32.1544	34.4708	36.0828	0.418107	0.378023	5.00948
	111007882	39.5039	14.6161	23.7034	14.1686	17.9832	21.4305	19.541	28.6954	42.0425	0.413985	0.465891	5.00913
	111019619	18.9191	24.3541	18.141	19.4079	20.7774	18.3036	20.7675	35.9776	38.1991	0.324335	0.421949	5.00904
	111012971	29.4415	27.2268	11.3594	16.9774	17.6505	30.8567	42.2268	29.4315	16.7381	0.391915	0.468105	5.00818
	111004831	19.8108	21.1666	24.9646	32.6113	17.1391	24.6153	28.8878	16.7331	24.9141	0.225212	0.316835	5.00663
	111015280	28.9507	22.2285	17.9135	17.6342	18.1544	17.8173	26.7259	32.1714	30.123	0.254732	0.302379	5.00369
	111006563	43.1341	27.5066	20.6965	33.003	14.877	29.3708	9.15632	17.9652	28.8789	0.414234	0.474156	5.00171

## Sheet: log2(FPKM) values
	Table S2. log2(FPKM) values of the 16 reference genes for construction of the heatmap
	Gene name (Gene symbol)	Root	Stem	Male flower	Female flower	Leaf	Pulp at green mature stage	Pulp at breaker stage	Pulp at turning stage	Pulp at yellow stage
	CYP(LOC111007901)	9.77704	9.92877	10.3988	10.0757	9.03027	10.0545	9.31547	9.49492	10.3479
	EF1α(LOC111011110)	8.77289	8.34151	4.69723	7.42353	7.38827	9.2677	8.81268	8.49051	8.45793
	TIP41(LOC111017412)	4.05676	4.51086	5.12721	4.922	4.42077	3.66175	3.86727	4.72133	4.90186
	ACT7(LOC111005604)	7.73232	9.26063	8.91994	8.97717	9.1882	8.51117	7.20264	6.93702	7.90393
	GAPDH(LOC111016929)	0.612369	8.7997	9.84019	8.42642	11.5292	9.16078	4.87901	4.89645	2.37833
	DNAJ(LOC111018672)	9.82503	8.97184	9.8792	9.32976	8.28668	9.09664	9.2256	10.1804	9.79998
	HSCP2(LOC111013580)	7.06636	9.06885	9.21446	9.62886	8.62603	8.98816	9.43585	8.63536	9.66627
	ARF1(LOC111006269)	9.46488	7.38656	9.24068	8.42401	6.99002	9.49461	9.01565	9.23078	8.95546
	UP(LOC111009092)	8.89866	7.66832	9.1015	8.20918	6.89382	8.7649	8.42854	9.34484	9.40757
	HMG1/2(LOC111012664)	7.97717	7.61003	9.11357	9.0058	7.63436	8.89921	8.65622	8.98272	9.31382
	TRXH-1(LOC111013893)	8.87358	8.4647	9.47119	9.32238	7.77833	8.20366	8.18215	8.46302	8.58154
	PHOS32(LOC111009491)	8.04502	8.22951	9.14815	8.51855	7.95967	8.03701	8.08384	8.36015	8.86905
	GAPDH2(LOC111008959)	8.76121	7.96269	7.93759	8.07805	7.12893	9.17588	8.82663	8.48246	7.47873
	RPL35-2(LOC111010277)	7.78138	7.9645	7.24602	7.54501	7.41512	8.37172	8.20469	8.07482	7.76916
	UBC36(LOC111012841)	7.1089	7.18676	8.60547	8.48002	6.76912	8.12633	8.34162	8.69003	8.8671
	RPS8(LOC111011823)	7.96006	8.23545	5.78691	7.43833	7.91213	8.2292	7.74283	7.89972	8.04112

## Sheet: Cq values
	Table S3. Cq values of the 16 reference genes
	Cq Value (Mean)	CYP	EF1α	TIP41	ACT7	GAPDH	DNAJ	HSCP2	ARF1	UP	HMG1/2	TRXH-1	PHOS32	GAPDH2	RPL35-2	UBC36	RPS8
	Root	22.4056	24.8003	27.7371	24.7271	32.6303	24.7697	28.5408	22.8922	23.1106	24.3887	22.2559	22.8457	22.5676	23.8275	24.5723	25.1224
	Root	22.105	24.4103	27.5347	24.4024	32.2515	24.5008	27.9607	22.6327	22.4538	24.0415	21.9382	22.4936	22.4183	23.8201	24.2181	24.4853
	Root	22.4642	24.4602	27.6978	24.5744	32.4556	24.4207	28.2274	22.8068	22.6408	24.2984	22.0516	22.7584	22.6419	24.0723	24.398	24.8641
	Stem	20.4408	23.6112	25.5864	21.2191	24.605	23.558	24.766	21.9131	22.6805	23.2871	19.251	21.0496	21.0809	21.8632	22.0826	23.0852
	Stem	19.9279	23.0233	25.1458	20.6494	24.1901	22.9016	24.4474	21.4332	21.9142	22.868	18.7804	20.5623	20.8411	21.8148	21.61	22.689
	Stem	20.1784	23.217	25.2269	20.8776	24.3937	23.1326	24.7102	21.6261	22.1118	23.0123	18.9685	20.7381	20.8958	21.3874	21.7832	22.9189
	Leaf	18.956	23.1017	23.5934	20.1818	20.8698	22.2159	24.8422	20.6678	21.3725	21.3376	18.4561	19.8429	20.8013	21.8816	21.2639	21.9831
	Leaf	18.3952	22.4088	23.379	19.9569	20.4641	21.7027	24.596	20.3696	20.9326	21.1091	18.2563	19.5999	20.713	21.779	20.9764	21.6101
	Leaf	18.5569	22.5787	23.4667	20.0938	20.6257	21.6703	24.7291	20.445	21.0684	21.2409	18.2809	19.6212	20.7007	21.8601	21.1396	21.8547
	Male flower	19.5708	25.3804	24.3911	21.0932	23.2198	21.2735	24.0562	19.9557	19.7662	21.2054	19.3169	20.1121	19.9221	22.3245	19.2957	24.7499
	Male flower	19.5403	25.177	24.3278	21.0441	23.2456	21.3895	24.0619	19.9152	19.6517	21.0212	19.2096	20.0271	19.8821	22.272	19.1947	24.4969
	Male flower	19.7348	25.3784	24.4768	21.2318	23.5738	21.5464	24.3173	20.0835	19.8986	21.1455	19.2742	20.1178	19.9693	22.2894	19.3042	24.7551
	Female flower	17.5133	20.8545	22.6493	19.1444	21.5845	21.9795	20.4978	19.7408	19.8526	19.8449	18.5633	18.9121	19.4798	19.3041	20.049	20.3668
	Female flower	17.4828	20.2702	22.5867	19.2057	22.0273	20.08	21.0027	19.7921	19.8585	19.9717	18.4631	18.6918	19.3089	19.0352	19.8887	19.7583
	Female flower	17.5314	19.8657	22.5993	19.1681	21.7658	19.5813	20.6847	19.6688	19.6897	19.9509	18.4398	18.6896	19.3569	19.0946	19.8499	19.619
	Pulp at green mature stage	17.7705	19.4229	22.3327	19.0118	20.8295	18.3772	22.29	18.6679	19.0616	19.97	18.4852	19.0664	18.6515	19.4111	19.5779	20.9623
	Pulp at green mature stage	17.5824	19.1083	22.2834	18.8584	20.7511	18.1922	22.1882	18.5333	18.8785	19.739	18.3813	19.0028	18.6979	19.411	19.4852	20.6273
	Pulp at green mature stage	17.7213	19.0667	22.3338	18.9447	21.0442	18.224	22.3538	18.6376	18.9406	19.6074	18.3949	18.9586	18.6954	19.3797	19.5742	20.3053
	Pulp at breaker stage	18.4121	21.4039	22.7582	20.7285	26.2804	19.5226	18.9005	19.3572	19.4389	20.4162	18.5397	19.6977	19.7264	19.6819	19.5213	21.0488
	Pulp at breaker stage	18.3429	20.9153	22.554	20.6309	26.3086	19.0067	18.8848	19.2781	19.3313	20.2703	18.4667	19.5469	19.7062	19.668	19.4314	20.8751
	Pulp at breaker stage	18.3701	20.93	22.5898	20.6786	26.4912	18.6688	19.1126	19.3913	19.4178	20.3706	18.4604	19.51	19.669	19.5324	19.4318	20.8761
	Pulp at turning stage	18.7142	21.5538	23.2936	21.4065	26.5578	19.1802	20.3924	19.4021	19.7218	20.913	19.2963	20.3238	20.1647	20.5936	20.4486	22.1257
	Pulp at turning stage	19.0229	21.912	23.3832	21.5299	27.0809	19.0754	20.8883	19.6809	19.981	21.0511	19.3467	20.3265	20.2047	20.5808	20.441	21.992
	Pulp at turning stage	19.2598	22.0915	23.6092	21.8035	27.2047	19.0239	20.9575	19.8062	20.1392	21.2434	19.483	20.4955	20.4934	20.7452	20.6427	22.0669
	Pulp at yellow stage	20.0653	27.3981	26.1553	24.3123	32.1003	25.0932	23.7843	23.2606	22.7655	24.5716	21.9242	22.6123	23.687	23.3725	22.636	25.5041
	Pulp at yellow stage	20.1587	25.3364	26.1727	24.3099	31.8654	23.2453	23.6847	23.2276	21.9908	23.5275	21.6085	22.6443	23.8146	23.4679	22.664	25.2329
	Pulp at yellow stage	20.3244	25.1832	26.1973	24.3406	31.9177	23.0918	23.712	23.2707	21.9004	23.8561	21.5157	22.7933	24.1301	23.5699	22.7657	24.8665
	Min	17.4828	19.0667	22.2834	18.8584	20.4641	18.1922	18.8848	18.5333	18.8785	19.6074	18.2563	18.6896	18.6515	19.0352	19.1947	19.619
	Max	22.4642	27.3981	27.7371	24.7271	32.6303	25.0932	28.5408	23.2707	23.1106	24.5716	22.2559	22.8457	24.1301	24.0723	24.5723	25.5041
	Range	4.98134	8.33138	5.45376	5.86872	12.1663	6.90104	9.65598	4.73749	4.23212	4.96422	3.99961	4.15607	5.47862	5.03707	5.37754	5.88505
	Mean	19.2796	22.6985	24.2245	21.2639	25.4198	21.312	23.1329	20.6095	20.6878	21.6392	19.4596	20.4089	20.6748	21.3348	20.9721	22.5497
	SD	1.44857	2.25376	1.7603	1.9262	4.26306	2.22023	2.67661	1.54235	1.37433	1.6446	1.37646	1.38542	1.56437	1.68151	1.66588	1.8976

## Sheet: stability analysis
	Table S4. Expression stability of the 16 reference genes
	Rank	RefFinder		ΔCt		BestKeeper		NormFinder		geNorm
		Gene	Stability	Gene	Stability	Gene	Stability	Gene	Stability	Gene	Stability
	1	HMG1/2	2	HMG1/2	1.005	TRXH-1	1.077	TIP41	0.17	HMG1/2	0.419
	2	PHOS32	2.913	TIP41	1.027	PHOS32	1.098	HMG1/2	0.253	ARF1	0.419
	3	ARF1	3.13	PHOS32	1.048	CYP	1.153	PHOS32	0.419	GAPDH2	0.503
	4	TIP41	3.31	ARF1	1.067	GAPDH2	1.2	ARF1	0.498	PHOS32	0.533
	5	GAPDH2	4.924	RPL35-2	1.116	UP	1.236	RPL35-2	0.526	UP	0.587
	6	TRXH-1	5.045	CYP	1.147	ARF1	1.302	CYP	0.598	TIP41	0.63
	7	CYP	5.422	GAPDH2	1.147	UBC36	1.366	GAPDH2	0.612	UBC36	0.67
	8	RPL35-2	6.887	TRXH-1	1.199	HMG1/2	1.415	ACT7	0.637	CYP	0.701
	9	UP	7.053	UP	1.207	RPL35-2	1.45	TRXH-1	0.69	TRXH-1	0.727
	10	UBC36	8.566	ACT7	1.24	TIP41	1.478	UBC36	0.783	RPL35-2	0.756
	11	ACT7	9.919	UBC36	1.246	ACT7	1.484	UP	0.805	ACT7	0.793
	12	RPS8	12	RPS8	1.333	RPS8	1.643	RPS8	0.886	RPS8	0.849
	13	DNAJ	13	DNAJ	1.422	DNAJ	1.839	DNAJ	1.024	DNAJ	0.907
	14	EF1α	14	EF1α	1.593	EF1α	1.851	EF1α	1.253	EF1α	0.977
	15	HSCP2	15	HSCP2	2.127	HSCP2	2.181	HSCP2	1.931	HSCP2	1.109
	16	GAPDH	16	GAPDH	3.399	GAPDH	3.563	GAPDH	3.311	GAPDH	1.395
	Table S5. Pairwise variation (V) of the 16 reference genes
		V2/3	V3/4	V4/5	V5/6	V6/7	V7/8	V8/9	V9/10	V10/11	V11/12	V12/13	V13/14	V14/15	V15/16
	Different tissues	0.145638	0.118654	0.0822901	0.0961046	0.0857498	0.0857282	0.0891373	0.0816877	0.0785613	0.0771484	0.100323	0.0985536	0.0976469	0.205261
	Different fruit ripening stages	0.0697407	0.0540765	0.0490379	0.0510737	0.0402452	0.0548232	0.0517914	0.0558248	0.0632173	0.0682169	0.0690125	0.0779578	0.113508	0.186239

## Sheet: candidate tissue-specific genes
	Table S6. List of 327 candidate tissue-specific genes after screening
	Gene symbol	Tissue	Root average FPKM	Stem average FPKM	Male flower average FPKM	Female flower average FPKM	Leaf average FPKM	Pulp at green mature stage average FPKM	τ-value
	111009957	Root	3523.49	0.668212	0	0.473465	2.35386	3.17185	0.999622
	111019402	Root	1407.61	11.8356	0.383172	5.72805	5.63751	47.1451	0.98995
	111022305	Root	1162.78	0	0	0	0	0	1
	111006702	Root	539.403	0	0	0.089964	0	24.4967	0.990884
	111018837	Root	530.732	0.10765	3.0781	0.143875	0	0	0.998745
	111022316	Root	524.137	0.0228734	0	0	0	0	0.999991
	111024781	Root	500.049	0.487541	13.6539	8.82097	0.664927	1.9827	0.989757
	111022314	Root	448.251	0	0	0	0	0	1
	111014004	Root	444.075	1.66391	0	1.13442	0.311708	8.18781	0.994912
	111013915	Root	354.879	24.9194	0.980664	1.01465	18.5703	43.8576	0.949649
	111021697	Root	287.938	1.7284	0	1.64755	0.0524256	6.95225	0.99279
	111014911	Root	283.865	0	0	0	0	2.19446	0.998454
	111017649	Root	281.176	0	0	0.058708	0	45.9535	0.967272
	111025973	Root	270.11	0	0.341945	0.533877	0.0633372	0.860648	0.998667
	111023524	Root	260.187	10.7898	1.17353	7.18039	7.15497	1.11046	0.978931
	111018321	Root	259.605	0	0	0	0	0	1
	111009886	Root	243.777	37.039	25.7274	14.426	13.2231	16.4517	0.912324
	111010683	Root	235.748	47.4725	0.923782	3.97633	11.7303	18.8554	0.929621
	111016283	Root	215.661	16.4271	6.78673	5.98037	40.5687	32.1697	0.90547
	111009301	Root	209.41	48.1186	0	0.901353	4.00291	39.1052	0.912012
	111018741	Root	206.997	19.3189	5.06616	10.3775	9.72165	25.1806	0.93269
	111007048	Root	203.269	14.5892	28.4141	28.1539	3.6925	17.0106	0.909617
	111015421	Root	196.726	0.144124	0	3.02458	0	2.76825	0.993964
	111008267	Root	187.834	1.35596	8.56526	3.8518	9.50274	18.1531	0.955888
	111019036	Root	161.827	11.2118	0	0.15456	0.0411655	0.152556	0.985713
	111007290	Root	152.991	1.51308	1.5253	0.725279	0.665681	38.7062	0.94361
	111017290	Root	144.262	3.43043	14.4142	21.2836	4.92575	25.0978	0.90413
	111007868	Root	142.005	0.0442807	0	0	0.0787002	30.3618	0.957065
	111017001	Root	141.994	2.76441	10.8014	15.5036	11.9468	1.48659	0.940134
	111004841	Root	140.89	13.1755	4.29714	8.64399	7.60159	26.5565	0.914437
	111016464	Root	134.049	2.52	0.119805	0.224289	1.14857	36.9842	0.938833
	111024279	Root	130.469	2.82147	0	0.00954733	0	0.0453043	0.995591
	111020067	Root	129.114	0	0	0.0561389	0	0.238188	0.999544
	111020077	Root	124.1	0	0	0.0865476	0	0	0.999861
	111007896	Root	121.08	2.27953	0	0.248299	0.419445	3.14257	0.989941
	111010840	Root	120.746	13.0498	4.1692	2.23114	0.501761	34.9074	0.909133
	111010901	Root	118.794	5.89495	0	0.721214	0.779976	11.2981	0.968527
	111015313	Root	114.336	3.77152	26.0714	10.9207	2.04468	4.94123	0.916475
	111005660	Root	110.075	4.21298	1.35982	0.905307	1.39785	17.6712	0.953582
	111024320	Root	108.124	9.38112	2.06766	3.24513	23.6652	10.4616	0.909695
	111008777	Root	105.736	10.9257	0.150683	8.60017	19.603	13.4416	0.900278
	111023265	Root	105.046	0.703483	0.470296	1.17671	1.20738	8.44446	0.977148
	111017723	Root	104.579	19.2915	3.31201	1.8258	1.32876	3.59684	0.943861
	111017527	Root	104.106	1.03419	3.56298	1.63973	0.829614	1.89861	0.982777
	111013331	Root	100.736	1.64023	34.9997	11.2514	0.216316	0.880654	0.902739
	111011235	Root	99.1978	5.18348	0.613896	0.43917	2.28312	0.550652	0.981713
	111007835	Root	95.3148	2.37721	5.22578	10.214	2.69248	5.03871	0.946392
	111024142	Root	94.5385	3.04486	0.628318	0.852902	0.276037	10.6089	0.967397
	111007826	Root	94.2356	1.99273	7.95703	10.0959	0.264795	15.4435	0.924118
	111018866	Root	91.0557	0.0960951	0.350858	0.153492	0.0923863	0.332999	0.997747
	111022577	Root	89.4295	1.26128	0.733615	0.0101458	0.0278778	0	0.995454
	111007431	Root	89.0802	4.68826	5.81389	5.31065	9.66933	10.4196	0.919395
	111016477	Root	88.6429	0	0	0	0	0	1
	111007593	Root	87.1786	0.805458	1.22298	1.74782	5.87724	7.47203	0.960712
	111016363	Root	81.3149	14.1432	0.493267	2.76539	4.44484	3.36827	0.937982
	111009823	Root	80.4939	0	6.36224	2.52231	0	0	0.977925
	111008624	Root	79.6558	3.92707	0.476337	1.62321	5.9239	14.7346	0.932999
	111025450	Root	76.6675	3.26882	0.0587906	0.547901	3.11894	12.839	0.948261
	111016790	Root	75.8356	3.79576	0.60899	0.788654	1.8014	9.50112	0.956496
	111007890	Root	75.7921	1.51183	9.85242	9.87256	0	6.18607	0.927637
	111006643	Root	74.1728	6.50431	2.41651	10.798	9.8612	5.005	0.906745
	111017650	Root	73.2647	0.286183	0	0.628348	0.0787276	5.42835	0.98247
	111008404	Root	68.8955	0.810344	0	0.022758	1.12962	0.558343	0.992681
	111022556	Root	68.6477	14.234	0.093936	1.27869	1.16567	1.58137	0.946528
	111024726	Root	67.0149	0.280367	0	0.0302249	0.757468	3.07715	0.987629
	111025075	Root	66.7895	7.35487	3.79737	2.77705	6.13632	4.66119	0.925956
	111015064	Root	63.7393	0.0498559	0	0	0	0	0.999844
	111014262	Root	63.5214	2.04078	4.04686	8.27113	2.07368	7.65889	0.924147
	111012435	Root	61.4009	4.61098	3.91045	5.15148	0.316153	1.05503	0.950997
	111008168	Root	60.4891	0.511439	2.09221	1.86568	0.178631	0.397195	0.983319
	111013289	Root	59.7267	0	0	0	0	0	1
	111009780	Root	58.6144	0.135866	0.123712	0.362369	0.0490086	13.0073	0.953328
	111022809	Root	57.9263	0	0	0	0	0	1
	111022857	Root	57.7659	0.116739	0	0	0.240991	18.1794	0.93582
	111014255	Root	57.6273	0.598139	0	0.539178	0.281777	0.0872179	0.994772
	111013453	Root	55.1608	1.58521	9.0557	0.300572	0.644604	7.1641	0.932016
	111018277	Root	54.4163	0.10983	0	0.223486	0	0.412156	0.99726
	111009801	Root	54.0762	0	0	0	0	1.45233	0.994629
	111015491	Root	54.0201	0	0.109204	0	0	0.267204	0.998606
	111024048	Root	53.4906	0.0687268	0.0738969	4.49991	0	2.94173	0.971643
	111017720	Root	53.264	0	0.15335	0	0	1.46687	0.993916
	111005409	Root	52.7373	5.27357	0.133002	1.04052	0.650796	0.346421	0.971768
	111019089	Root	51.5757	0.0203183	0.0722466	0.19553	0.159405	8.24012	0.966311
	111008640	Root	50.9708	0.112796	0.132435	0.0779106	0.113013	0.283848	0.997175
	111022002	Stem	18.3943	489.388	0	31.4652	1.10729	4.22293	0.977445
	111015335	Stem	0	367.984	31.5346	36.638	5.99808	1.45403	0.958898
	111017377	Stem	11.7428	166.378	0.793774	7.39924	17.5444	1.33755	0.953338
	111022563	Stem	0.334517	89.4184	0.299827	6.76129	1.08365	0.563276	0.979775
	111009573	Stem	0.0200639	79.7496	2.48865	0.653243	23.3074	0.0522997	0.933488
	111013891	Stem	0.21535	79.2344	0.891147	4.87999	26.9135	1.99203	0.911927
	111013507	Stem	0	66.7778	0.880152	5.5103	7.40595	0.246793	0.957941
	111009374	Stem	0.488174	60.3894	0.137128	15.5291	3.21114	5.06601	0.919086
	111023517	Stem	12.7946	58.6729	3.16595	0	0.19946	0	0.944915
	111008925	Stem	0.022088	56.5182	0.134316	0.710727	1.82518	1.67973	0.984529
	111010180	Stem	2.74221	52.0147	0.0590157	1.97799	0.784761	0.545363	0.976509
	111017498	Stem	0	51.865	0.06593	4.91081	18.669	0.0150351	0.90876
	111008414	Male flower	2.95358	1.43034	879.982	40.7708	3.22625	4.15164	0.988061
	111010620	Male flower	18.9444	17.0648	848.414	41.0146	20.7491	27.9698	0.970358
	111019143	Male flower	41.2091	13.9145	551.484	39.5053	4.92403	24.6647	0.954952
	111020789	Male flower	20.7348	4.13825	494.406	47.321	16.8865	3.09815	0.962711
	111008344	Male flower	14.4529	42.8729	411.32	38.0812	16.3931	45.9214	0.92331
	111021921	Male flower	10.4003	10.1075	358.833	35.8668	3.78557	7.41168	0.962338
	111005073	Male flower	13.9586	5.47456	341.813	14.6596	5.66762	41.0927	0.952692
	111012170	Male flower	0	0.0810701	332.067	25.7931	0.936001	15.6623	0.974419
	111009493	Male flower	12.5616	14.9933	315.313	47.2911	9.17509	40.9188	0.920752
	111014989	Male flower	20.7858	14.9554	311.317	34.298	5.55352	14.1157	0.942368
	111008153	Male flower	6.12917	10.646	282.793	26.4775	7.64948	30.5735	0.942378
	111021441	Male flower	7.17838	9.18635	279.741	49.2583	8.07899	15.0749	0.936529
	111007366	Male flower	0	12.0464	263.853	24.4268	26.9106	0	0.951955
	111018987	Male flower	5.80003	0.941676	257.35	20.675	1.71241	1.61694	0.976106
	111019839	Male flower	1.36997	6.09127	250.27	42.5417	11.1469	0.462956	0.950763
	111010369	Male flower	12.5529	17.6576	248.043	39.4883	21.76	3.24651	0.923638
	111011686	Male flower	0.220817	0.329552	244.976	8.30929	0.444725	1.53416	0.991151
	111018915	Male flower	0	0.0828094	241.39	48.9235	0	0.282412	0.959163
	111013830	Male flower	3.00659	2.5693	236.528	25.2107	17.3538	3.59863	0.956251
	111014987	Male flower	2.29243	3.91047	234.976	15.4011	3.05466	1.3787	0.977838
	111012168	Male flower	15.7549	0.395204	231.467	44.3155	0.437404	0.361531	0.947064
	111017305	Male flower	0.271037	0.166675	222.95	30.1264	28.6226	4.70607	0.942684
	111013934	Male flower	2.12439	12.4703	217.839	46.0264	24.377	14.0358	0.909076
	111009768	Male flower	0.931904	1.30389	216.641	6.98148	15.8121	0.955931	0.976011
	111015823	Male flower	0.747892	2.00782	215.499	15.5047	1.28963	2.9276	0.979139
	111016508	Male flower	7.02676	9.12742	213.188	15.4324	1.6756	5.99676	0.96317
	111011256	Male flower	1.13066	10.6396	210.437	43.4163	29.2842	9.6719	0.910526
	111006991	Male flower	13.8685	3.89845	207.143	32.158	4.36297	46.0099	0.903161
	111007345	Male flower	6.41439	10.4342	206.95	9.69747	12.4289	14.4135	0.948405
	111010126	Male flower	1.53833	0.465533	201.218	44.0576	0.110836	1.11971	0.952994
	111007143	Male flower	32.7859	3.69663	201.12	11.6872	1.11486	30.7548	0.920406
	111010789	Male flower	3.28934	0.422016	199.62	15.1823	8.33361	19.7666	0.952917
	111009279	Male flower	4.82923	12.6068	190.419	27.3085	5.48499	20.5928	0.925614
	111011097	Male flower	3.24495	28.5164	190.136	13.8469	2.66234	30.4593	0.917186
	111010063	Male flower	19.6104	5.45784	189.255	21.7715	4.6953	37.8437	0.905547
	111016851	Male flower	3.71127	4.37075	178.577	30.3171	9.0908	8.91069	0.936833
	111009508	Male flower	6.07826	6.98568	178.266	41.6053	12.8906	12.2563	0.910453
	111005356	Male flower	0.214654	1.03512	177.151	19.1801	0.451137	2.18694	0.973957
	111009223	Male flower	1.58607	4.49095	176.653	18.5382	15.1136	32.6722	0.91803
	111004588	Male flower	7.11249	8.72344	175.213	46.6761	8.86564	3.34329	0.914708
	111006647	Male flower	5.30508	1.95962	170.531	5.67973	3.32877	5.91351	0.973979
	111010496	Male flower	12.9526	4.43612	167.909	28.3543	18.3556	8.68153	0.91331
	111025069	Male flower	10.0527	2.35	167.777	15.1575	3.59601	1.69503	0.960839
	111021078	Male flower	12.0652	8.9638	164.315	9.37096	8.40348	14.8234	0.934727
	111006565	Male flower	0.103133	0.657956	163.347	38.2104	3.69864	0.672083	0.946932
	111014601	Male flower	3.88067	7.44026	161.938	13.0596	0.583082	8.86425	0.958221
	111019205	Male flower	4.20859	2.82657	160.833	5.1361	2.37075	15.1961	0.96302
	111008768	Male flower	16.7268	12.6461	159.268	14.7717	5.79918	18.5103	0.914039
	111005329	Male flower	2.06838	20.7078	158.477	30.3253	0.769735	7.87561	0.922075
	111021422	Male flower	0.552163	0.0307838	152.967	4.65128	0.0607912	0.0150191	0.993057
	111018426	Male flower	6.83421	11.3427	144.514	9.4487	5.35104	20.3292	0.926227
	111011558	Male flower	0.765021	0.460344	143.128	25.0805	0.119338	1.23768	0.961345
	111018046	Male flower	4.66946	10.4826	137.413	16.5353	19.5554	14.4037	0.904454
	111017049	Male flower	0.35665	0.540238	135.9	5.91675	0.313245	4.34911	0.983111
	111025998	Male flower	0.906113	0.0578871	128.308	43.2174	0.327737	2.94194	0.926036
	111019182	Male flower	2.89158	0.879498	125.979	26.6087	0.13856	3.39533	0.94616
	111017525	Male flower	0.0694743	8.62657	125.751	13.0581	13.4779	0.456719	0.943239
	111019484	Male flower	0.885938	1.94834	121.374	29.5733	0.25987	20.0274	0.91317
	111020046	Male flower	3.10666	9.22755	120.502	25.8232	18.9167	2.35911	0.901357
	111020450	Male flower	1.77949	8.38451	119.991	28.4792	0.206985	6.29197	0.924757
	111025530	Male flower	5.16021	1.93358	117.489	14.7614	10.9915	0.0374665	0.944022
	111005493	Male flower	4.61505	0.403063	116.335	35.9213	0.594719	12.3523	0.90736
	111021029	Male flower	0.247446	0.446135	113.044	36.5957	0.186946	0.475531	0.932855
	111020435	Male flower	0.0561208	0	112.435	2.54369	0.023419	5.72806	0.985145
	111018834	Male flower	5.18451	7.23067	109.305	9.21491	8.80023	6.22771	0.932925
	111020838	Male flower	3.71038	0.0338639	103.256	46.2384	0	0.115653	0.902963
	111015929	Male flower	0.0704283	3.88534	102.833	29.5868	5.88226	1.21811	0.920954
	111018398	Male flower	0	0.225632	102.58	7.28862	0.113537	0.613326	0.983932
	111008368	Male flower	1.23681	1.52146	98.275	3.86669	1.33965	6.28553	0.970999
	111022573	Male flower	5.50714	8.98332	97.9529	17.9155	8.30341	4.36486	0.907967
	111019769	Male flower	6.73328	2.44702	95.4911	1.3596	0.102119	6.88604	0.963289
	111005836	Male flower	2.44673	4.36484	94.8024	16.0393	11.7375	2.00237	0.922806
	111013939	Male flower	0.614818	9.59047	93.8503	20.5146	10.969	0.676031	0.909718
	111010184	Male flower	3.77941	0.810551	91.978	5.34719	0.292845	3.28592	0.970611
	111008787	Male flower	2.89916	1.36873	90.8638	15.9363	0.730907	3.63897	0.94591
	111005511	Male flower	0.111367	1.01446	87.1759	25.8146	4.29936	0.315651	0.927605
	111006531	Male flower	0	0.035178	85.1124	30.6994	0.743552	0.0656081	0.925877
	111007544	Male flower	0.729851	0.974826	83.8783	20.491	0.395299	1.34674	0.942923
	111009686	Male flower	0.0648414	5.64852	83.629	13.0073	0.326887	8.07016	0.935148
	111010133	Male flower	9.4014	5.73776	83.5604	15.9298	1.12453	2.9571	0.915868
	111013755	Male flower	5.25731	2.08369	82.552	25.8416	1.58281	5.35051	0.90281
	111006165	Male flower	0.704735	0.167723	82.066	14.255	0.287017	1.3473	0.95915
	111007813	Male flower	0.00722816	3.89589	81.5334	17.8875	15.9941	0.402339	0.906328
	111013200	Male flower	0.706717	0.101984	81.2306	39.3186	0.0540356	0.228111	0.900507
	111007363	Male flower	1.49971	0.444608	79.949	1.59442	1.12147	5.02236	0.975778
	111016173	Male flower	0.0134099	0.0600209	79.0026	10.8769	0.212643	7.03704	0.953925
	111011655	Male flower	0.128995	4.43383	76.4389	4.15114	12.7411	1.60012	0.939677
	111025610	Male flower	7.18862	0.785059	73.4016	20.6476	1.32468	0.24759	0.917731
	111011009	Male flower	3.40596	0.952431	73.2854	9.82919	1.39814	2.5708	0.95045
	111010843	Male flower	4.78945	8.02881	73.1645	11.5709	2.21214	6.23838	0.910231
	111019676	Male flower	0	0	68.726	0.0363079	0	0	0.999894
	111009086	Male flower	0.913981	5.94791	68.6754	10.0637	1.82668	0.828498	0.942976
	111024947	Male flower	3.75481	8.35736	62.4459	6.93641	4.8366	4.30582	0.909711
	111021760	Male flower	1.2191	1.43899	61.149	12.9087	3.05309	1.45004	0.934357
	111007025	Male flower	0.919313	1.83862	61.0555	16.145	0.533515	1.3192	0.93201
	111008285	Male flower	5.77299	0.722638	58.034	9.24351	3.17525	4.46663	0.919423
	111014077	Male flower	0.819145	2.05532	56.9977	12.7588	7.04235	4.23292	0.90558
	111022862	Male flower	0.0135501	0.0381773	56.2267	1.94369	0.507889	0.0279396	0.990996
	111024021	Male flower	0.895192	0.0930278	53.9583	8.5214	0.197548	0	0.96402
	111024896	Male flower	0.396942	0.0568875	53.4885	8.5523	0.0269617	3.07513	0.954726
	111005929	Male flower	0.308813	0.951645	53.2365	10.2428	2.54184	1.87031	0.940209
	111019774	Male flower	0.0225744	0.0788777	52.6416	5.90869	0.0939731	0.0294219	0.976697
	111019661	Male flower	1.37891	4.9867	52.1639	12.528	3.53549	0.197669	0.913247
	111012660	Male flower	4.90362	0.311159	51.2543	1.25831	0.0637331	6.78934	0.948
	111025241	Male flower	5.62674	2.11556	50.8071	11.1677	1.05895	0.822505	0.918155
	111005788	Male flower	10.6888	0.167197	50.7432	5.79342	0.455289	7.98469	0.901112
	111023312	Female flower	27.4476	0	45.0413	183.173	0	9.5627	0.910411
	111010164	Female flower	0.520846	21.259	47.5429	165.851	6.35664	1.33038	0.907134
	111016958	Female flower	0.781058	1.0954	43.3149	125.641	0.42066	0.523203	0.92656
	111004564	Female flower	0.118226	0.424657	23.389	87.1085	0.828862	0	0.94315
	111015133	Female flower	2.00274	1.32984	29.635	78.1524	1.37425	2.93384	0.904608
	111022245	Female flower	0	0	15.8594	65.7551	0	0	0.951762
	111018273	Female flower	0	0.0611945	0	52.5488	0	8.25901	0.968333
	111014945	Leaf	4.69027	0.347038	0.288709	6.74896	1297.38	0	0.998139
	111022727	Leaf	3.69966	31.7834	10.086	12.6061	292.665	41.7247	0.931731
	111004830	Leaf	1.2682	12.4725	13.0888	12.3085	279.375	32.5011	0.948715
	111020534	Leaf	0	0.0356367	0	2.01821	240.74	0	0.998294
	111022459	Leaf	4.25633	29.7195	14.6515	16.152	236.389	43.7535	0.908175
	111007104	Leaf	1.15069	15.6798	1.41594	3.54004	209.859	29.4325	0.951187
	111006556	Leaf	0.457399	20.7508	1.44662	8.0572	189.11	1.90587	0.965504
	111016634	Leaf	16.513	23.918	4.83586	11.0076	180.715	22.7511	0.912541
	111008208	Leaf	5.84382	37.5388	2.5114	10.4492	162.169	10.6774	0.917345
	111007042	Leaf	2.2637	19.9588	19.7291	8.59301	155.86	23.3021	0.90524
	111025975	Leaf	16.8674	30.0602	2.78359	5.55047	150.249	0.454817	0.925834
	111016538	Leaf	2.28617	8.22151	0.520153	2.72977	137.483	5.13616	0.972515
	111006019	Leaf	1.39466	35.1581	7.64609	9.60028	136.392	13.897	0.900733
	111020267	Leaf	1.02354	6.40907	22.6447	8.37099	129.903	7.82916	0.928751
	111008026	Leaf	0.0120802	22.0316	0.450453	8.24773	121.134	0.121157	0.949043
	111023700	Leaf	0.294841	1.05355	4.43556	0.098263	99.5751	1.86678	0.984436
	111014722	Leaf	1.10146	16.7607	1.06866	6.03653	98.7571	9.7342	0.929724
	111011634	Leaf	0.0275293	21.6152	1.92453	2.62811	89.4528	13.9691	0.9102
	111016474	Leaf	15.0914	18.3144	3.5979	2.43517	85.9183	0.160787	0.90782
	111023879	Leaf	0	0.172092	13.7187	15.07	80.6068	0.425373	0.927088
	111008524	Leaf	0.851416	2.55052	0.152842	1.73125	75.6495	1.12199	0.983059
	111012735	Leaf	0	0.391987	4.68616	0.65918	72.9314	0	0.984267
	111022894	Leaf	4.05016	13.1608	2.98657	5.1859	68.2343	4.93874	0.911123
	111025971	Leaf	0	1.89176	1.05021	0.797827	66.9969	0.0427364	0.988708
	111022521	Leaf	0	18.2484	0	1.21275	64.0528	0.538457	0.937553
	111007533	Leaf	0	0.746988	0.213554	2.20142	63.7123	1.33926	0.98587
	111019276	Leaf	5.48398	11.9352	0.0784473	5.80548	62.3909	5.74928	0.90687
	111009161	Leaf	0.132932	0.203814	0.545194	2.39542	62.2726	0.711466	0.987189
	111008691	Leaf	4.29051	8.71362	1.27975	5.11734	62.021	5.74755	0.918902
	111023830	Leaf	0.598328	5.07189	8.19757	5.42826	61.209	1.00176	0.933677
	111021314	Leaf	3.22829	2.82363	2.70759	3.80315	60.1897	9.28444	0.927406
	111024760	Leaf	0	1.15971	0.545067	1.93901	59.1111	0	0.987671
	111012965	Leaf	0	0	2.03939	1.6644	58.3774	0	0.987311
	111023335	Leaf	2.45014	6.10751	3.87387	2.95488	57.3893	9.22403	0.914233
	111011055	Leaf	0.61423	3.73913	0	0.0702158	56.6343	0	0.984378
	111022359	Leaf	2.47075	12.508	1.69317	5.19011	55.467	1.73471	0.914916
	111009237	Leaf	4.86236	10.9495	1.00709	5.35635	51.3011	2.25109	0.904772
	111025721	Leaf	0.121711	0.795793	0	0.2758	50.6505	1.26403	0.990297
	111009438	Pulp	4.63327	5.80563	0	0.468077	0.263765	5930.71	0.999623
	111009556	Pulp	3.47112	1.06554	0.0980607	0.668245	1.89489	1984.32	0.999275
	111009351	Pulp	43.0424	0.672312	4.20958	0.728584	0.382429	1770.76	0.994462
	111006468	Pulp	0.0721148	0	20.8912	0.724048	0	1681.23	0.99742
	111025395	Pulp	0	0	0.25951	5.29317	0	1305	0.999149
	111013486	Pulp	48.662	20.4626	6.72171	8.41184	10.458	844.94	0.97758
	111011621	Pulp	34.0438	0.205751	0.991746	1.81113	0.0487575	777.545	0.990457
	111011638	Pulp	12.4287	1.86364	20.6182	38.2028	4.03749	615.268	0.974921
	111021031	Pulp	2.29654	9.44801	1.31117	8.52534	4.26527	314.093	0.983542
	111021188	Pulp	11.4777	11.9448	0.341902	0.882676	1.62395	290.787	0.981931
	111011809	Pulp	2.67736	5.31619	0.200207	18.8943	2.13952	258.704	0.977405
	111015899	Pulp	0.527395	1.73688	3.67258	2.77216	4.80044	245.927	0.989013
	111020486	Pulp	0	5.77142	4.51734	9.3922	0.506685	245.166	0.983531
	111004941	Pulp	10.5826	33.0832	3.85138	7.88656	21.3796	238.279	0.935552
	111011278	Pulp	0.0261622	0.0232962	6.07929	3.70784	0	236.844	0.991694
	111012035	Pulp	0	0	0.405922	0.0360093	0	229.683	0.999615
	111006443	Pulp	19.0616	30.0156	4.95992	48.3495	3.04616	224.408	0.906035
	111013522	Pulp	21.7911	1.67344	4.15577	4.82543	1.42762	212.899	0.968179
	111013025	Pulp	16.9233	0.68042	30.1478	34.3764	0.897664	189.429	0.912341
	111022870	Pulp	19.6391	5.94169	20.0753	12.9493	5.33493	184.599	0.930725
	111014635	Pulp	37.6671	10.769	12.3997	6.53751	0.375789	165.047	0.917903
	111006181	Pulp	15.0261	6.11765	0.566636	2.01896	1.09094	163.526	0.969644
	111018861	Pulp	1.86972	15.7887	0.0217933	5.19691	3.6102	163.453	0.96759
	111025981	Pulp	2.40026	0.497103	7.56443	2.97463	3.17976	158.232	0.978998
	111021978	Pulp	0.144823	0	0	0	0	157.883	0.999817
	111006521	Pulp	0.922673	0	0	0	0	157.282	0.998827
	111011275	Pulp	16.1271	18.3587	8.26876	14.545	10.262	155.869	0.91331
	111015535	Pulp	9.71908	4.98712	3.25071	8.15575	10.8159	150.596	0.950957
	111010034	Pulp	4.60731	2.98237	0	2.18163	0.0274892	149.739	0.986912
	111012799	Pulp	1.91916	0	4.96071	1.971	0	141.582	0.987497
	111013490	Pulp	18.3879	0	0.329378	0.0740122	0	135.909	0.972347
	111008308	Pulp	15.3504	11.2986	5.82974	25.5374	6.74522	133.274	0.902815
	111011956	Pulp	7.30295	14.073	0	2.05552	10.1764	130.183	0.948368
	111006444	Pulp	3.25825	0.81566	0	5.85718	0.347774	129.41	0.984114
	111018919	Pulp	0.718382	0.161104	0.905064	0.663285	0.0811537	128.628	0.996068
	111020994	Pulp	26.8507	0.549673	0.198045	0.122103	0.911358	128.485	0.955431
	111013517	Pulp	40.8399	0.0617253	1.23078	1.02652	3.20919	127.174	0.927079
	111015636	Pulp	1.92274	3.75486	1.31684	2.03408	17.1772	119.324	0.956076
	111005017	Pulp	0.934484	6.3208	0	3.17283	1.06145	116.729	0.980314
	111005286	Pulp	2.2124	0.0991588	1.5315	0.494852	1.07908	116.13	0.990671
	111018935	Pulp	23.0406	1.35846	1.2919	3.52273	1.71743	115.211	0.946305
	111016982	Pulp	13.9993	5.21974	2.30972	6.21981	3.40334	109.046	0.942865
	111016030	Pulp	0.152012	0.232786	0.179558	14.5702	0.186458	108.34	0.971717
	111014412	Pulp	21.4579	0.0392522	5.47751	1.74373	0.377943	102.34	0.943138
	111021589	Pulp	7.58346	17.8807	1.94193	8.51872	11.916	101.268	0.905516
	111011340	Pulp	20.7029	4.69954	5.03865	4.50829	12.0995	100.072	0.90597
	111026159	Pulp	18.4012	5.96082	5.98209	6.18284	6.36019	99.3312	0.913648
	111009221	Pulp	24.551	1.06387	0	0.5238	0.541041	91.6808	0.941799
	111021385	Pulp	12.6049	0.656609	5.11831	5.8771	6.09335	90.7491	0.933112
	111019723	Pulp	2.16287	7.92448	0.353112	2.27391	1.10171	90.4941	0.969465
	111017448	Pulp	0	0.173633	0	0.284237	0.577088	84.3679	0.997547
	111007398	Pulp	3.50999	11.2132	1.52374	7.60425	0.258616	82.1334	0.941291
	111012211	Pulp	11.1288	4.16921	1.58553	11.4615	0.0333852	81.581	0.930429
	111011500	Pulp	6.69557	5.01085	0.367806	2.52907	10.4714	78.1467	0.935826
	111019002	Pulp	4.8243	5.58762	3.04395	9.64883	1.10749	76.8517	0.93699
	111014796	Pulp	1.76187	3.13051	0.305798	1.29345	10.3028	76.2126	0.955928
	111011695	Pulp	6.50788	2.92963	0.613325	1.51597	5.66129	71.7269	0.951962
	111006158	Pulp	0.216122	0.10597	0	0	0.155241	68.9443	0.998615
	111024814	Pulp	0.146406	1.33068	6.90247	13.5896	1.32623	66.0924	0.929507
	111022451	Pulp	7.55217	0.252368	0.64699	2.05238	3.28344	66.0143	0.958229
	111010988	Pulp	0.43417	10.2735	0.155677	3.15656	3.89219	65.9168	0.945652
	111017981	Pulp	8.93111	3.59518	0	9.46596	5.87074	65.2223	0.91456
	111019357	Pulp	10.0633	3.53703	1.06498	4.32689	5.32244	64.9417	0.925119
	111008922	Pulp	11.4087	1.68623	0.164163	0.777565	6.15264	63.8616	0.936772
	111011112	Pulp	4.52795	4.83574	1.69332	10.455	3.58164	63.7953	0.921331
	111018233	Pulp	1.082	0.219161	0.962139	0.0517289	0.794217	63.3381	0.990182
	111005544	Pulp	0.121018	0.375975	15.3071	11.6344	0.122664	62.4538	0.911739
	111019195	Pulp	0.465896	0.969664	0.303665	7.66803	2.04743	61.0889	0.962498
	111008554	Pulp	0.321659	0.213504	0.0610733	0	0.220088	60.7413	0.997312
	111016279	Pulp	4.51466	1.28229	9.5264	12.6349	1.6498	60.1636	0.901575
	111018137	Pulp	0.0164604	0.966869	0.208068	0.272646	0.658661	58.9118	0.992794
	111013605	Pulp	0.0266886	0.46657	10.7409	15.782	0.165116	58.7551	0.907476
	111018232	Pulp	5.82176	0.155254	1.1227	0.307237	0.723388	57.0024	0.971474
	111023328	Pulp	15.8688	0.900432	3.3341	4.34077	2.52015	56.5398	0.904618
	111011958	Pulp	2.35966	8.31282	1.07495	1.62104	10.6459	56.4412	0.914905
	111010025	Pulp	6.65926	0.577766	0.58882	0.287832	0.850669	56.0185	0.967995
	111012457	Pulp	6.12073	9.74808	0.328901	5.02677	3.60177	55.7326	0.910909
	111011905	Pulp	0.0215165	1.58289	0.549987	15.4615	1.08612	53.5469	0.930147
	111014484	Pulp	1.27769	3.29028	2.21167	7.1162	7.71858	53.4531	0.919127
	111019955	Pulp	1.75297	0.850182	2.1102	1.63125	1.97861	50.2458	0.96687
